# Supplementary material for: Catalytic (5 + 1) cycloaddition of diazooxindoles with imidazolidines to access novel piperazine-spirooxindole frameworks
Source: Royal Society of Chemistry journal article supplement (doi:10.1039/d5qo00361j), 2025-01-01
Supplement: d5qo00361j1.pdf [file d5qo00361j1.pdf]

## SUPPORTING INFORMATION

---

### **Catalytic (5+1) Cycloaddition of Diazoindoles with Imidazolidines to Access Novel Piperazine-Spirooxindole Frameworks**

Yijun Duan,<sup>#,a</sup> Feng Chen,<sup>#,a</sup> Yuncheng Liu,<sup>#,a</sup> Wendi Xu,<sup>#,a</sup> Xue Zhang,<sup>#,a</sup> Ming Lang<sup>a</sup> and Shiyong Peng<sup>\*,a</sup>

<sup>a</sup>School of Pharmacy and Food Engineering, Wuyi University, Jiangmen 529020, P. R. China

\*psy880124@mail.nankai.edu.cn

<sup>#</sup>The authors contributed equally to this work

## SUPPORTING INFORMATION

## SAMPLE INFORMATION

|                   |                  |                  |                        |
|-------------------|------------------|------------------|------------------------|
| Sample Name:      | ZX_P363 IG 5VS95 | Acquired By:     | Breeze                 |
| Sample Type:      | 未知               | Date Acquired:   | 2023/9/28 14:23:21 CST |
| Vial:             | 1:A,2            | Acq. Method:     | 5vs95                  |
| Injection #:      | 1                | Date Processed:  | 2023/9/29 16:59:48 CST |
| Injection Volume: | 10.00 ul         | Channel Name:    | 240.0 纳米               |
| Run Time:         | 16.00 Minutes    | Channel Desc.:   | 2998 (210-400)纳米       |
| Column Type:      |                  | Sample Set Name: | XWD                    |

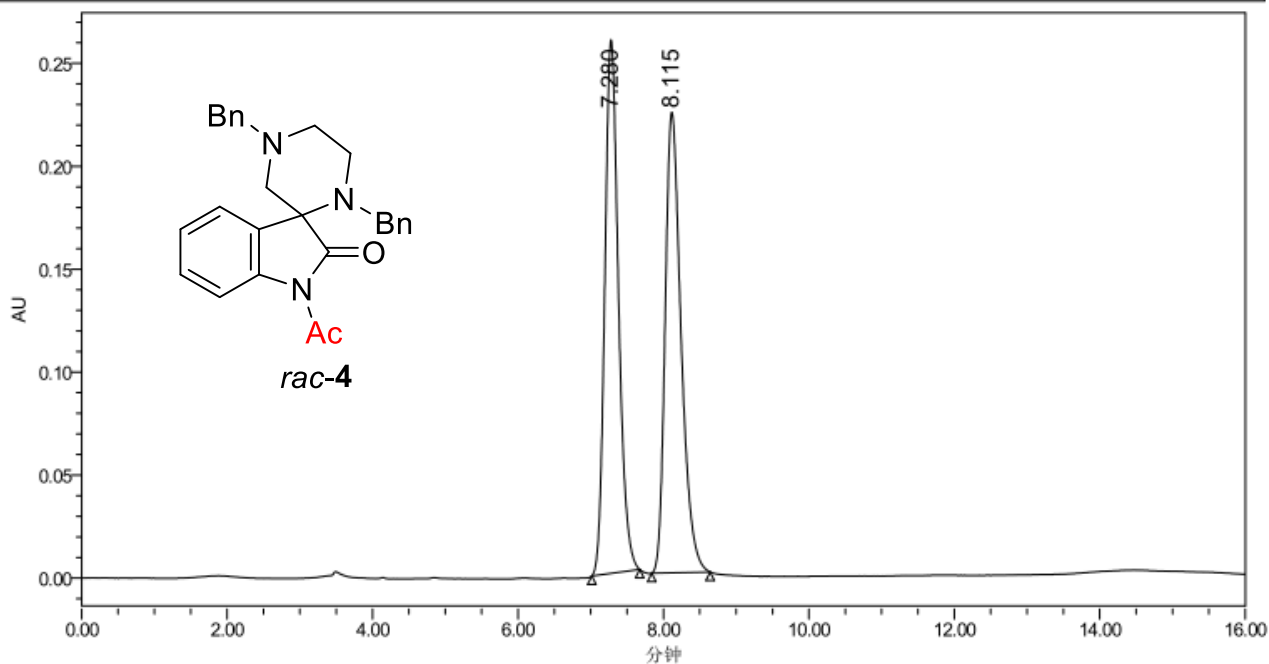

|   | RT<br>(min) | Area    | % Area | Height | % Height |
|---|-------------|---------|--------|--------|----------|
| 1 | 7.280       | 3375987 | 49.85  | 259114 | 53.67    |
| 2 | 8.115       | 3396091 | 50.15  | 223654 | 46.33    |

## SUPPORTING INFORMATION

## SAMPLE INFORMATION

|                   |                   |                  |                        |
|-------------------|-------------------|------------------|------------------------|
| Sample Name:      | XWD_P522 IG 5VS95 | Acquired By:     | Breeze                 |
| Sample Type:      | 未知                | Date Acquired:   | 2023/9/29 16:04:12 CST |
| Vial:             | 1:A,1             | Acq. Method:     | 5vs95                  |
| Injection #:      | 1                 | Date Processed:  | 2023/9/29 16:36:03 CST |
| Injection Volume: | 10.00 ul          | Channel Name:    | 240.0 纳米               |
| Run Time:         | 16.00 Minutes     | Channel Desc.:   | 2998 (210-400)纳米       |
| Column Type:      |                   | Sample Set Name: | XWD                    |

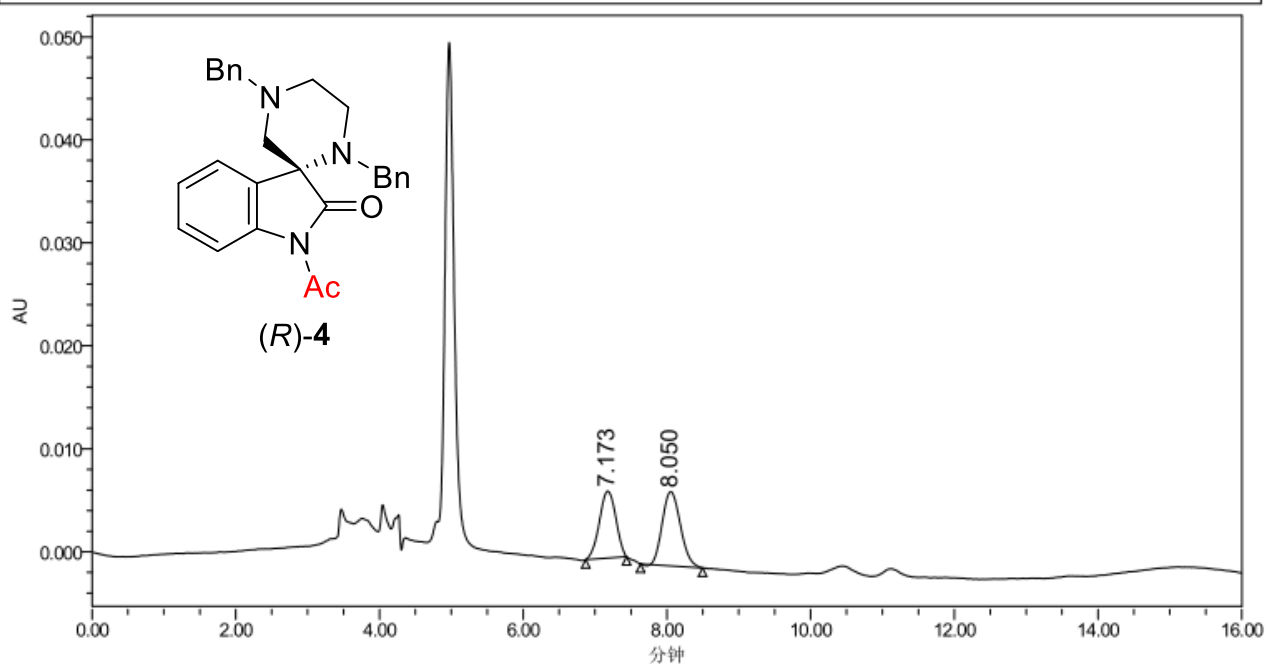

|   | RT<br>(min) | Area   | % Area | Height | % Height |
|---|-------------|--------|--------|--------|----------|
| 1 | 7.173       | 102949 | 44.67  | 6491   | 47.42    |
| 2 | 8.050       | 127509 | 55.33  | 7198   | 52.58    |

## SUPPORTING INFORMATION

## SAMPLE INFORMATION

Sample Name: ZX\_P372 IE 20VS80  
Sample Type: 未知  
Vial: 1:A,2  
Injection #: 1  
Injection Volume: 10.00 ul  
Run Time: 40.00 Minutes  
Column Type:

Acquired By: Breeze  
Date Acquired: 2023/9/28 11:41:38 CST  
Acq. Method: 20vs80  
Date Processed: 2023/9/28 12:27:52 CST  
Channel Name: 250.0 纳米  
Channel Desc.: 2998 (210-400)纳米  
Sample Set Name: XWD

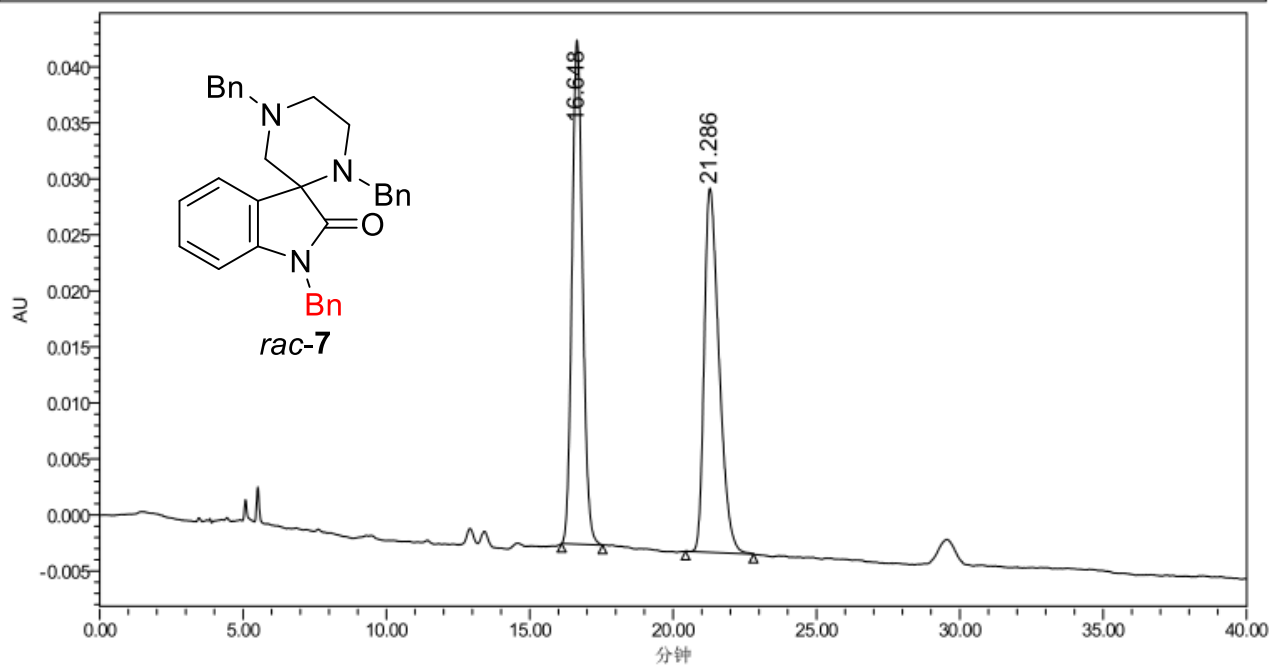

|   | RT<br>(min) | Area    | % Area | Height | % Height |
|---|-------------|---------|--------|--------|----------|
| 1 | 16.648      | 1155248 | 49.68  | 44992  | 58.06    |
| 2 | 21.286      | 1170159 | 50.32  | 32496  | 41.94    |

## SUPPORTING INFORMATION

## SAMPLE INFORMATION

Sample Name: XWD\_P525 IE 20VS80  
Sample Type: 未知  
Vial: 1:A,1  
Injection #: 1  
Injection Volume: 10.00 ul  
Run Time: 40.00 Minutes  
Column Type:

Acquired By: Breeze  
Date Acquired: 2023/9/28 11:01:16 CST  
Acq. Method: 20vs80  
Date Processed: 2023/9/28 11:43:35 CST  
Channel Name: 250.0 纳米  
Channel Desc.: 2998 (210-400) 纳米  
Sample Set Name: XWD

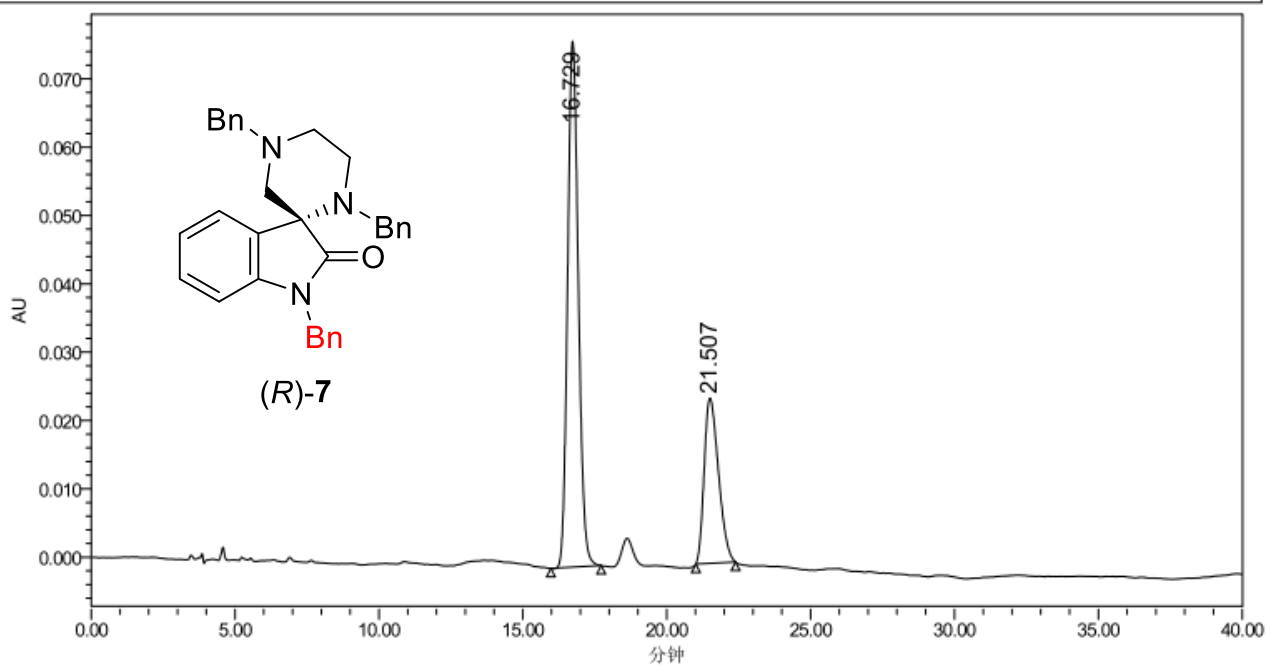

|   | RT<br>(min) | Area    | % Area | Height | % Height |
|---|-------------|---------|--------|--------|----------|
| 1 | 16.729      | 1990652 | 70.45  | 76931  | 76.09    |
| 2 | 21.507      | 834865  | 29.55  | 24180  | 23.91    |

# SUPPORTING INFORMATION

## SAMPLE INFORMATION

Sample Name: ZX\_P564 IA 5VS95  
 Sample Type: 未知  
 Vial: 1:A,4  
 Injection #: 1  
 Injection Volume: 10.00 ul  
 Run Time: 15.00 Minutes  
 Column Type:

Acquired By: Breeze  
 Date Acquired: 2023/9/27 18:14:31 CST  
 Acq. Method: 5vs95  
 Date Processed: 2023/9/27 20:53:26 CST  
 Channel Name: 270.0 纳米  
 Channel Desc.: 2998 (210-400)纳米  
 Sample Set Name: XWD

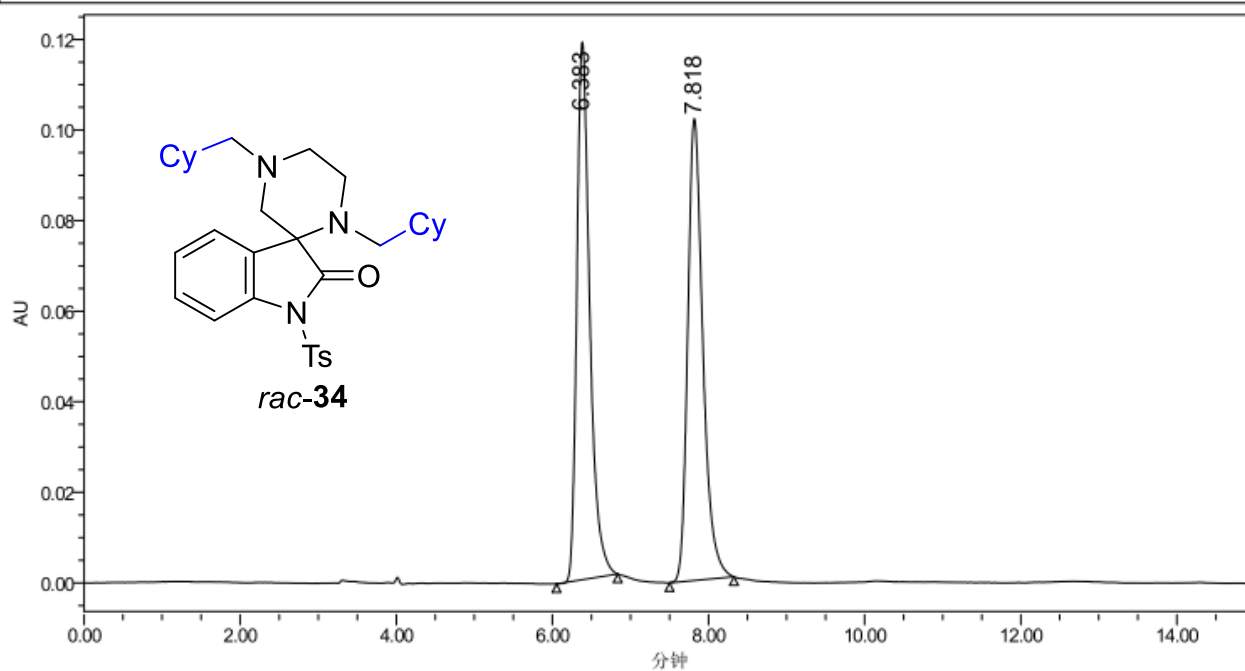

|   | RT<br>(min) | Area    | % Area | Height | % Height |
|---|-------------|---------|--------|--------|----------|
| 1 | 6.383       | 1362989 | 49.77  | 118713 | 53.80    |
| 2 | 7.818       | 1375360 | 50.23  | 101956 | 46.20    |

## SUPPORTING INFORMATION

## SAMPLE INFORMATION

Sample Name: XWD\_P572 IA 5VS95  
Sample Type: 未知  
Vial: 1:A,3  
Injection #: 1  
Injection Volume: 10.00 ul  
Run Time: 15.00 Minutes  
Column Type:

Acquired By: Breeze  
Date Acquired: 2023/9/27 20:32:53 CST  
Acq. Method: 5vs95  
Date Processed: 2023/9/27 20:52:23 CST  
Channel Name: 270.0 纳米  
Channel Desc.: 2998 (210-400) 纳米  
Sample Set Name: XWD

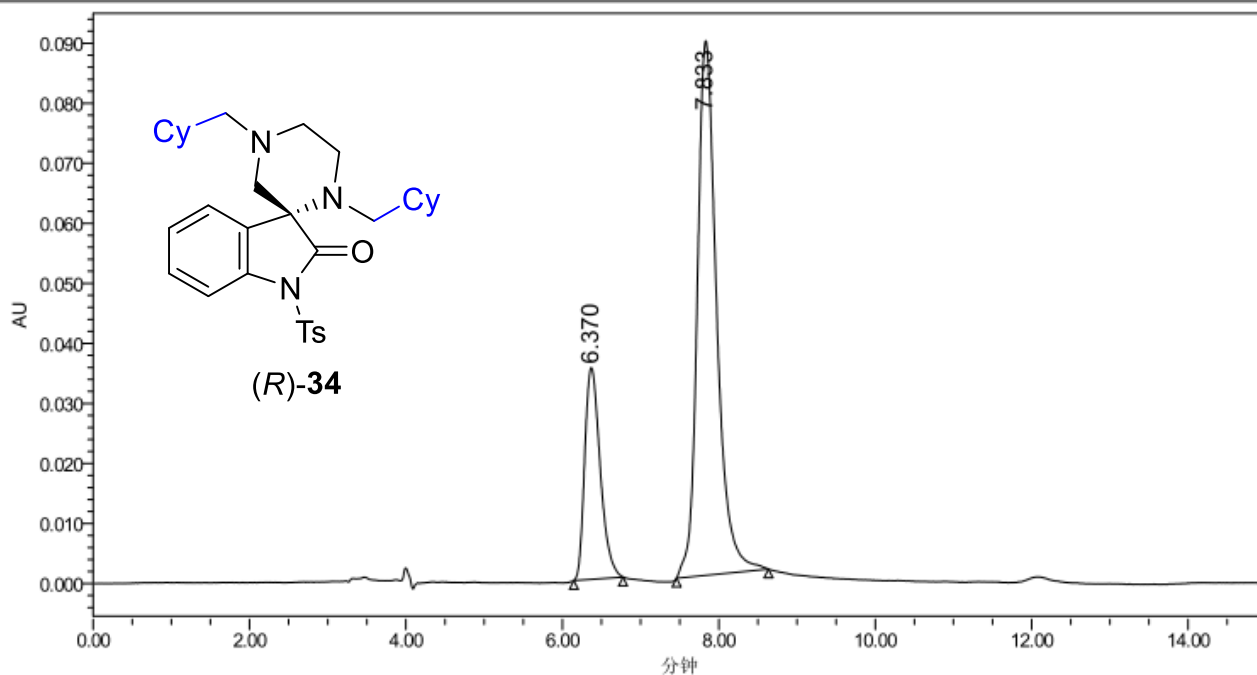

|   | RT<br>(min) | Area    | % Area | Height | % Height |
|---|-------------|---------|--------|--------|----------|
| 1 | 6.370       | 485134  | 24.01  | 35213  | 28.35    |
| 2 | 7.833       | 1535508 | 75.99  | 89013  | 71.65    |

SUPPORTING INFORMATION

SAMPLE INFORMATION

Sample Name: ZX\_P390 IA 30VS70

Sample Type: 未知

Vial: 1:A,2

Injection #: 1

Injection Volume: 10.00 ul

Run Time: 30.00 Minutes

Column Type:

Acquired By: Breeze

Date Acquired: 2023/9/28 16:07:28 CST

Acq. Method: 30vs70

Date Processed: 2023/9/28 16:41:19 CST

Channel Name: 240.0 纳米

Channel Desc.: 2998 (210-400)纳米

Sample Set Name: XWD

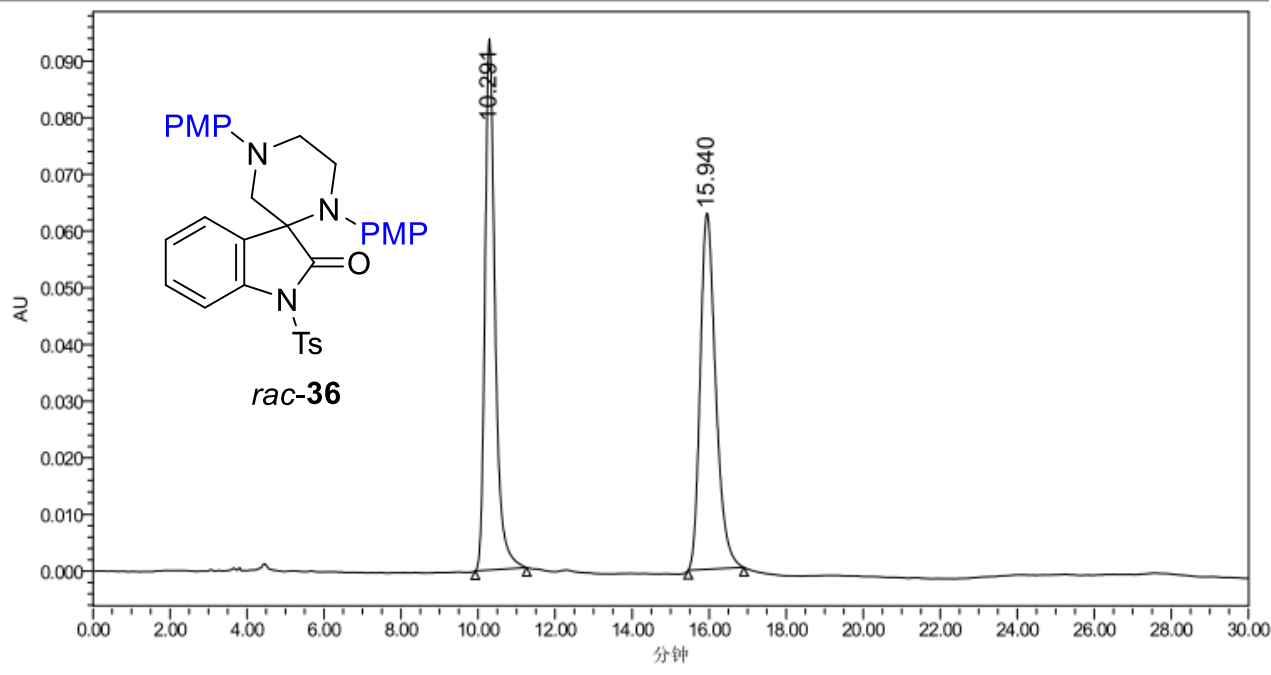

|   | RT<br>(min) | Area    | % Area | Height | % Height |
|---|-------------|---------|--------|--------|----------|
| 1 | 10.291      | 1708965 | 49.28  | 93716  | 59.85    |
| 2 | 15.940      | 1758652 | 50.72  | 62859  | 40.15    |



| SAMPLE INFORMATION |                    |                  |                        |  |  |
|--------------------|--------------------|------------------|------------------------|--|--|
| Sample Name:       | XWD_P548 IA 30VS70 | Acquired By:     | Breeze                 |  |  |
| Sample Type:       | 未知                 | Date Acquired:   | 2023/9/28 15:37:04 CST |  |  |
| Vial:              | 1:A,1              | Acq. Method:     | 30vs70                 |  |  |
| Injection #:       | 1                  | Date Processed:  | 2023/9/28 16:39:38 CST |  |  |
| Injection Volume:  | 10.00 ul           | Channel Name:    | 250.0 纳米               |  |  |
| Run Time:          | 30.00 Minutes      | Channel Desc.:   | 2998 (210-400)纳米       |  |  |
| Column Type:       |                    | Sample Set Name: | XWD                    |  |  |

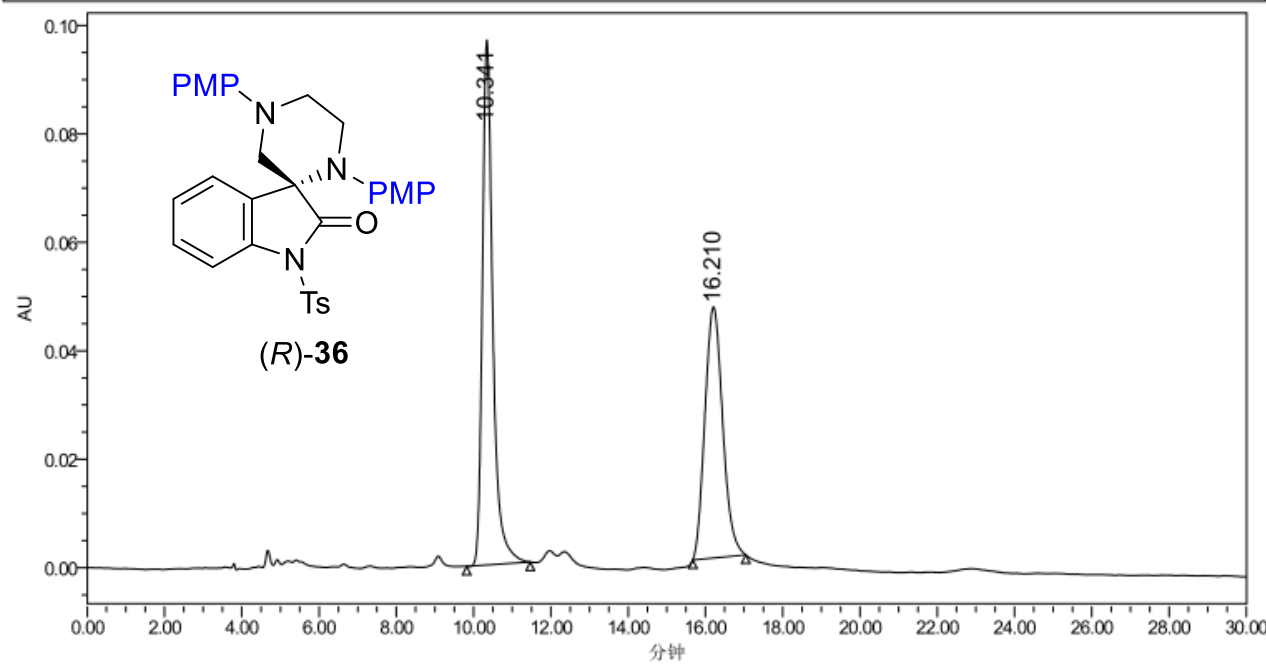

|   | RT<br>(min) | Area    | % Area | Height | % Height |
|---|-------------|---------|--------|--------|----------|
| 1 | 10.341      | 1815541 | 55.11  | 96829  | 67.66    |
| 2 | 16.210      | 1478739 | 44.89  | 46272  | 32.34    |

## SUPPORTING INFORMATION

## SAMPLE INFORMATION

Sample Name: ZX\_P535 IA 20VS80  
Sample Type: 未知  
Vial: 1:A,4  
Injection #: 1  
Injection Volume: 10.00 ul  
Run Time: 14.00 Minutes  
Column Type:

Acquired By: Breeze  
Date Acquired: 2023/9/27 14:25:23 CST  
Acq. Method: 20vs80  
Date Processed: 2023/9/27 14:47:27 CST  
Channel Name: 280.0 纳米  
Channel Desc.: 2998 (210-400)纳米  
Sample Set Name: XWD

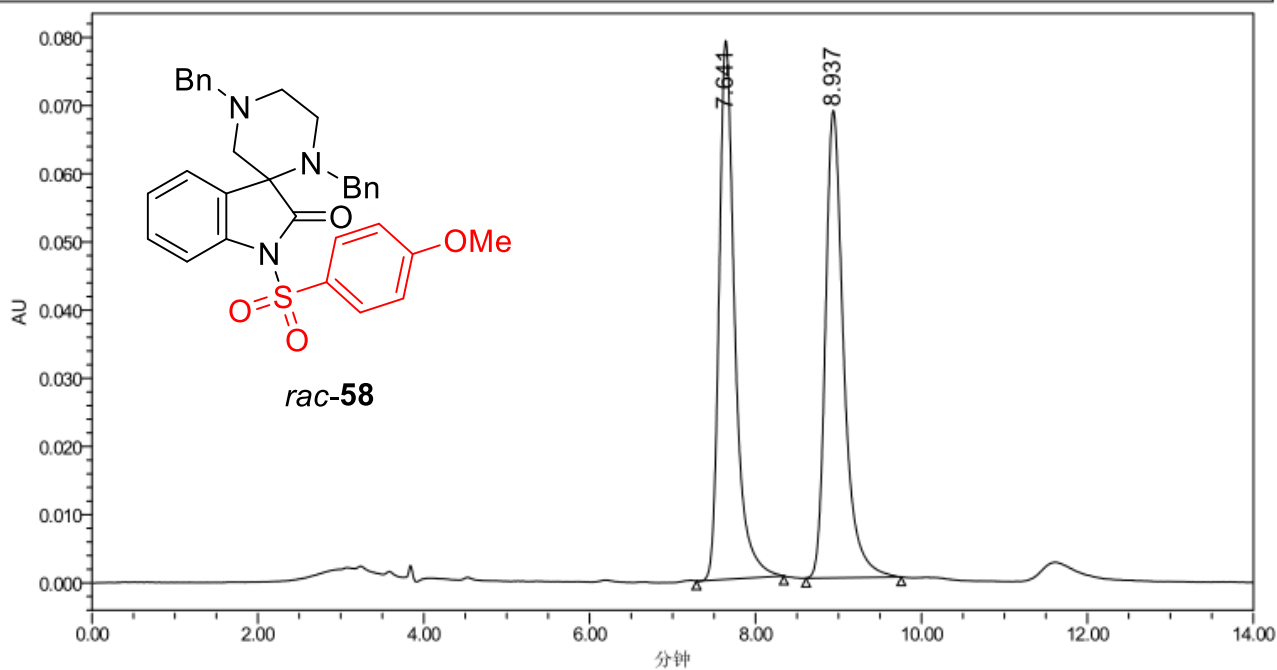

|   | RT<br>(min) | Area    | % Area | Height | % Height |
|---|-------------|---------|--------|--------|----------|
| 1 | 7.641       | 1043276 | 49.91  | 78997  | 53.54    |
| 2 | 8.937       | 1047122 | 50.09  | 68546  | 46.46    |

## SAMPLE INFORMATION

Sample Name: XWD\_P527 IA 20VS80  
Sample Type: 未知  
Vial: 1:A,3  
Injection #: 1  
Injection Volume: 10.00 ul  
Run Time: 14.00 Minutes  
Column Type:

Acquired By: Breeze  
Date Acquired: 2023/9/27 14:10:59 CST  
Acq. Method: 20vs80  
Date Processed: 2023/9/27 14:35:38 CST  
Channel Name: 280.0 纳米  
Channel Desc.: 2998 (210-400)纳米  
Sample Set Name: XWD

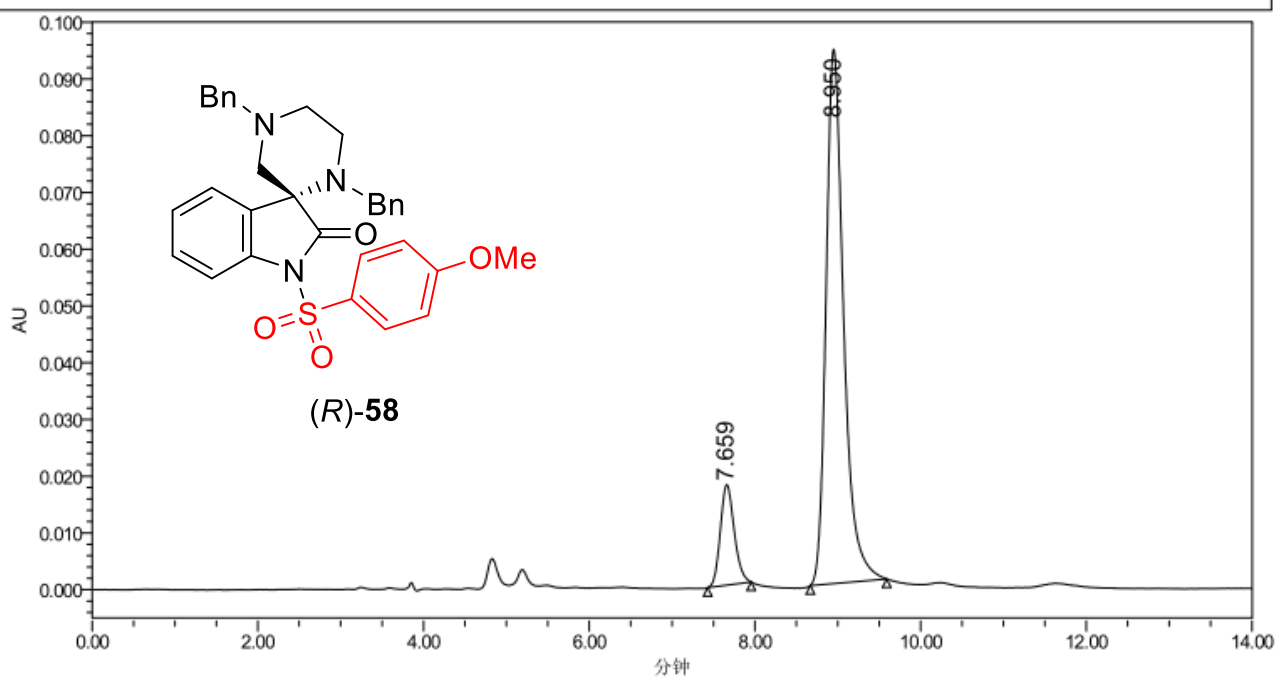

|   | RT<br>(min) | Area    | % Area | Height | % Height |
|---|-------------|---------|--------|--------|----------|
| 1 | 7.659       | 206177  | 12.93  | 17694  | 15.82    |
| 2 | 8.950       | 1387819 | 87.07  | 94161  | 84.18    |

## SAMPLE INFORMATION

Sample Name: ZX\_P534 IA 5VS95  
Sample Type: 未知  
Vial: 1:A,2  
Injection #: 1  
Injection Volume: 10.00 ul  
Run Time: 25.00 Minutes  
Column Type:

Acquired By: Breeze  
Date Acquired: 2023/9/27 21:55:04 CST  
Acq. Method: 5vs95  
Date Processed: 2023/9/27 22:29:10 CST  
Channel Name: 254.0 纳米  
Channel Desc.: 2998 (210-400)纳米  
Sample Set Name: XWD

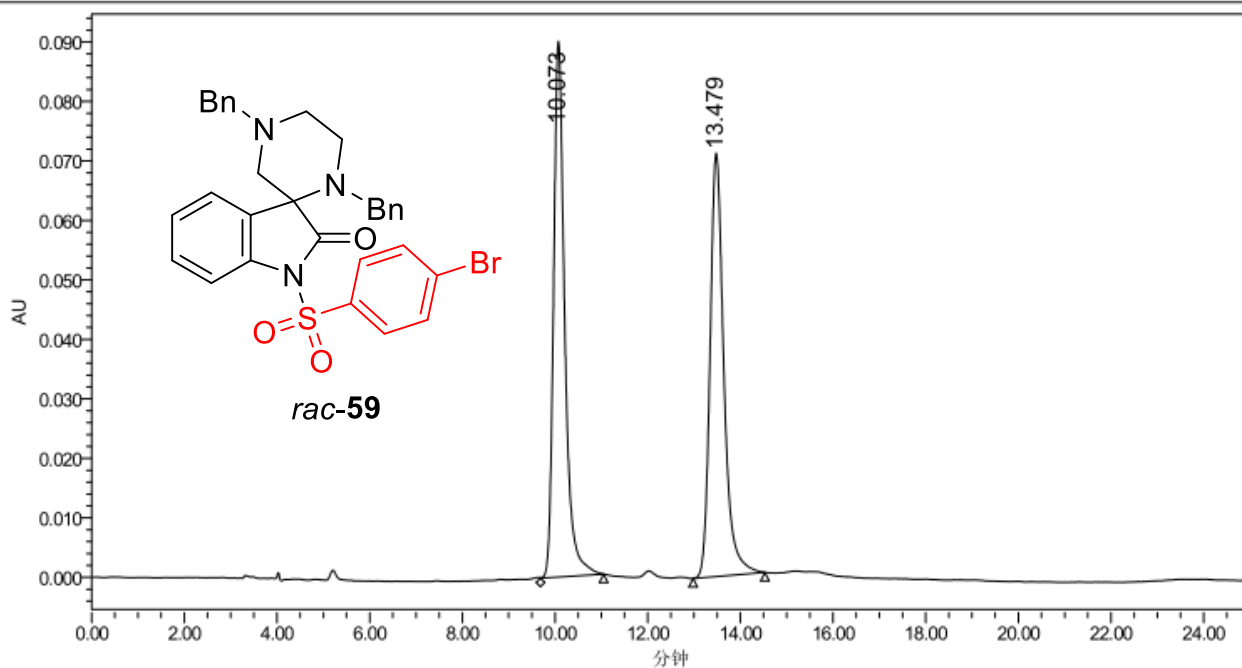

|   | RT<br>(min) | Area    | % Area | Height | % Height |
|---|-------------|---------|--------|--------|----------|
| 1 | 10.073      | 1502228 | 50.56  | 90076  | 55.86    |
| 2 | 13.479      | 1468890 | 49.44  | 71163  | 44.14    |

## SUPPORTING INFORMATION

## SAMPLE INFORMATION

Sample Name: XWD\_P526 IA 5VS95  
Sample Type: 未知  
Vial: 1:A,1  
Injection #: 1  
Injection Volume: 10.00 ul  
Run Time: 25.00 Minutes  
Column Type:

Acquired By: Breeze  
Date Acquired: 2023/9/27 21:29:40 CST  
Acq. Method: 5vs95  
Date Processed: 2023/9/27 22:03:09 CST  
Channel Name: 254.0 纳米  
Channel Desc.: 2998 (210-400)纳米  
Sample Set Name: XWD

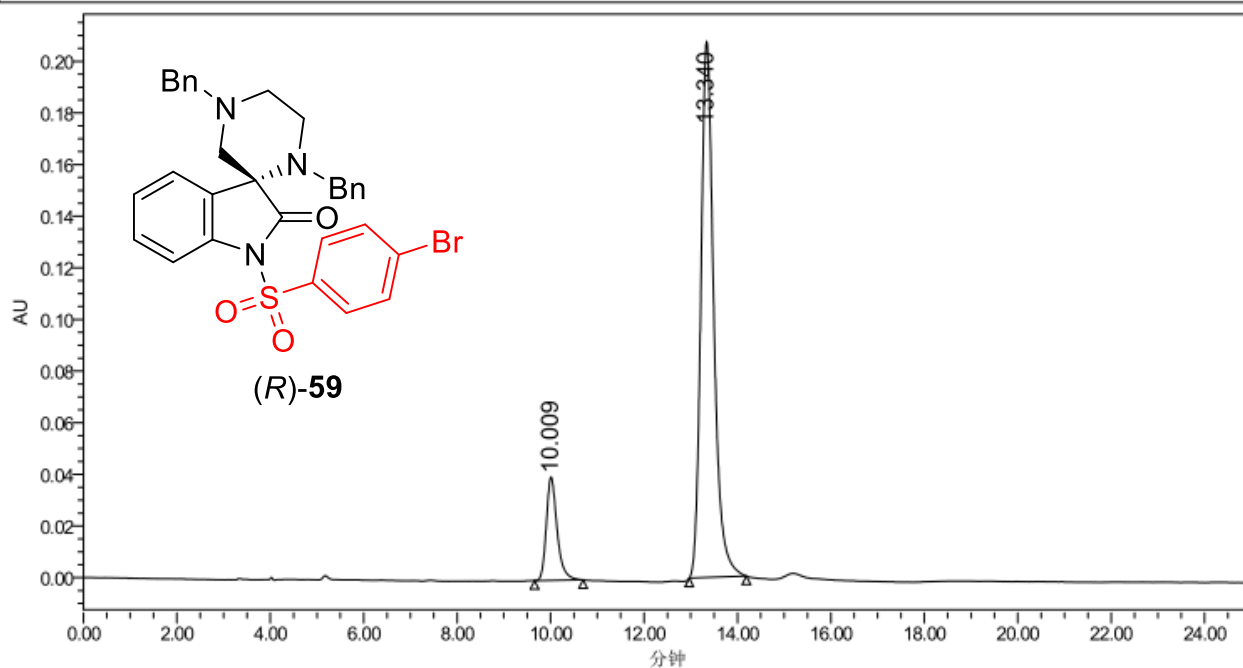

|   | RT<br>(min) | Area    | % Area | Height | % Height |
|---|-------------|---------|--------|--------|----------|
| 1 | 10.009      | 642726  | 13.93  | 40062  | 16.17    |
| 2 | 13.340      | 3969842 | 86.07  | 207685 | 83.83    |

## SUPPORTING INFORMATION

## SAMPLE INFORMATION

|                   |                   |                  |                        |
|-------------------|-------------------|------------------|------------------------|
| Sample Name:      | XWD_P526 IA 5VS95 | Acquired By:     | Breeze                 |
| Sample Type:      | 未知                | Date Acquired:   | 2023/11/13 8:57:02 CST |
| Vial:             | 1:A,1             | Acq. Method:     | 5vs95                  |
| Injection #:      | 1                 | Date Processed:  | 2023/11/13 9:32:52 CST |
| Injection Volume: | 10.00 ul          | Channel Name:    | 254.0 纳米               |
| Run Time:         | 25.00 Minutes     | Channel Desc.:   | 2998 (210-400)纳米       |
| Column Type:      |                   | Sample Set Name: | XWD                    |

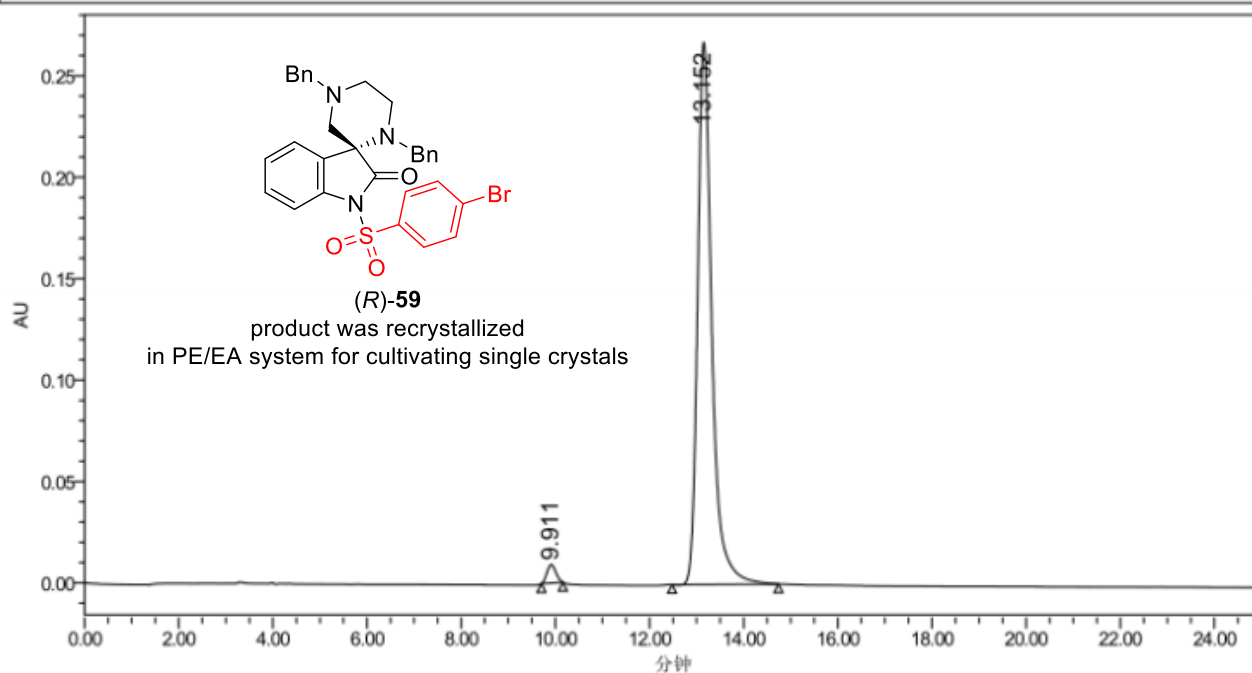

|   | RT<br>(min) | Area    | % Area | Height | % Height |
|---|-------------|---------|--------|--------|----------|
| 1 | 9.911       | 119111  | 2.08   | 9061   | 3.28     |
| 2 | 13.152      | 5595423 | 97.92  | 267380 | 96.72    |

SUPPORTING INFORMATION

SAMPLE INFORMATION

|                   |                   |                  |                        |
|-------------------|-------------------|------------------|------------------------|
| Sample Name:      | XWD_P526 IA 5VS95 | Acquired By:     | Breeze                 |
| Sample Type:      | 未知                | Date Acquired:   | 2023/11/3 18:25:01 CST |
| Vial:             | 1:A,1             | Acq. Method:     | 5vs95                  |
| Injection #:      | 1                 | Date Processed:  | 2023/11/3 18:52:53 CST |
| Injection Volume: | 10.00 ul          | Channel Name:    | 209.6 纳米               |
| Run Time:         | 25.00 Minutes     | Channel Desc.:   | 2998 (210-400)纳米       |
| Column Type:      |                   | Sample Set Name: | XWD                    |

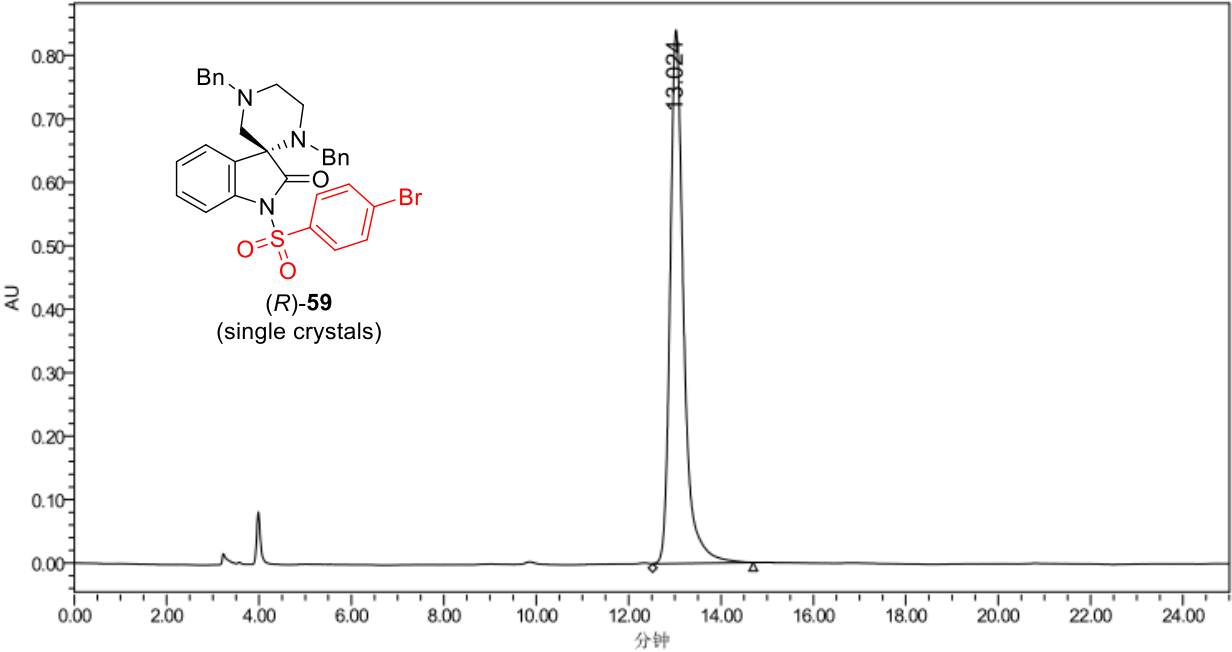

|   | RT<br>(min) | Area     | % Area | Height | % Height |
|---|-------------|----------|--------|--------|----------|
| 1 | 13.024      | 17059027 | 100.00 | 840826 | 100.00   |

## SAMPLE INFORMATION

Sample Name: ZX\_P572 IA 5VS95  
Sample Type: 未知  
Vial: 1:A,2  
Injection #: 1  
Injection Volume: 10.00 ul  
Run Time: 25.00 Minutes  
Column Type:

Acquired By: Breeze  
Date Acquired: 2023/9/27 17:33:45 CST  
Acq. Method: 5vs95  
Date Processed: 2023/9/27 18:07:46 CST  
Channel Name: 254.0 纳米  
Channel Desc.: 2998 (210-400) 纳米  
Sample Set Name: XWD

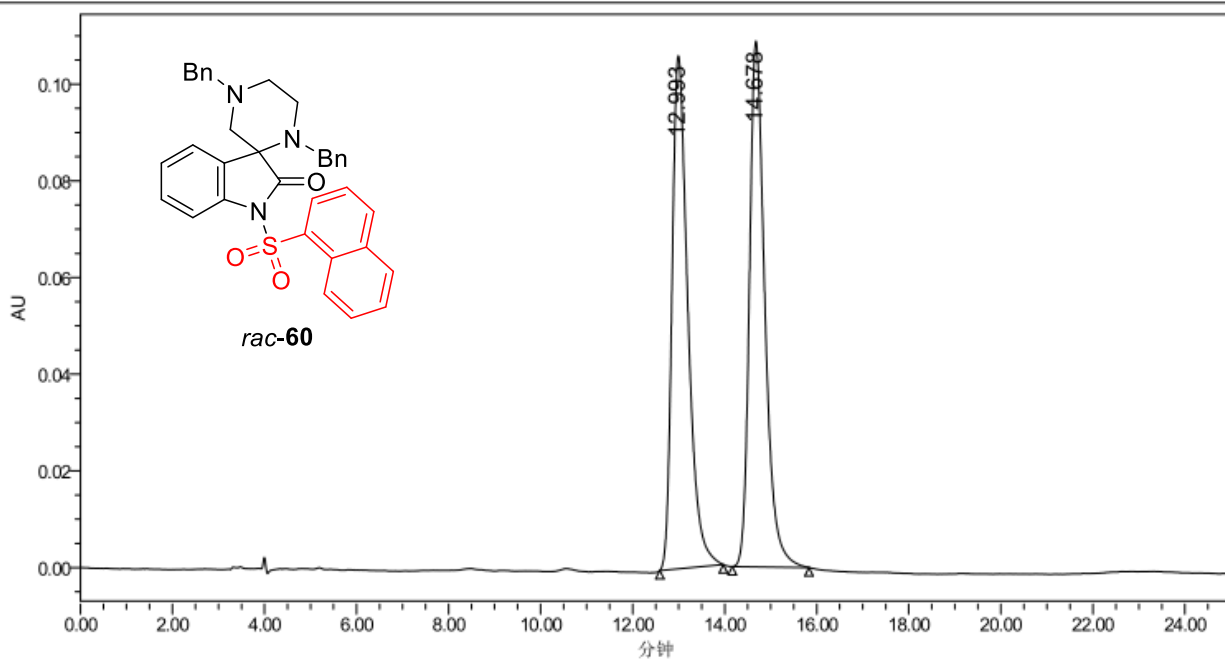

|   | RT<br>(min) | Area    | % Area | Height | % Height |
|---|-------------|---------|--------|--------|----------|
| 1 | 12.993      | 2524954 | 49.93  | 106131 | 49.39    |
| 2 | 14.678      | 2531549 | 50.07  | 108757 | 50.61    |



## SAMPLE INFORMATION

Sample Name: XWD\_P577 IA 5VS95  
Sample Type: 未知  
Vial: 1:A,1  
Injection #: 1  
Injection Volume: 10.00 ul  
Run Time: 25.00 Minutes  
Column Type:

Acquired By: Breeze  
Date Acquired: 2023/9/27 17:08:23 CST  
Acq. Method: 5vs95  
Date Processed: 2023/9/27 18:06:56 CST  
Channel Name: 254.0 纳米  
Channel Desc.: 2998 (210-400)纳米  
Sample Set Name: XWD

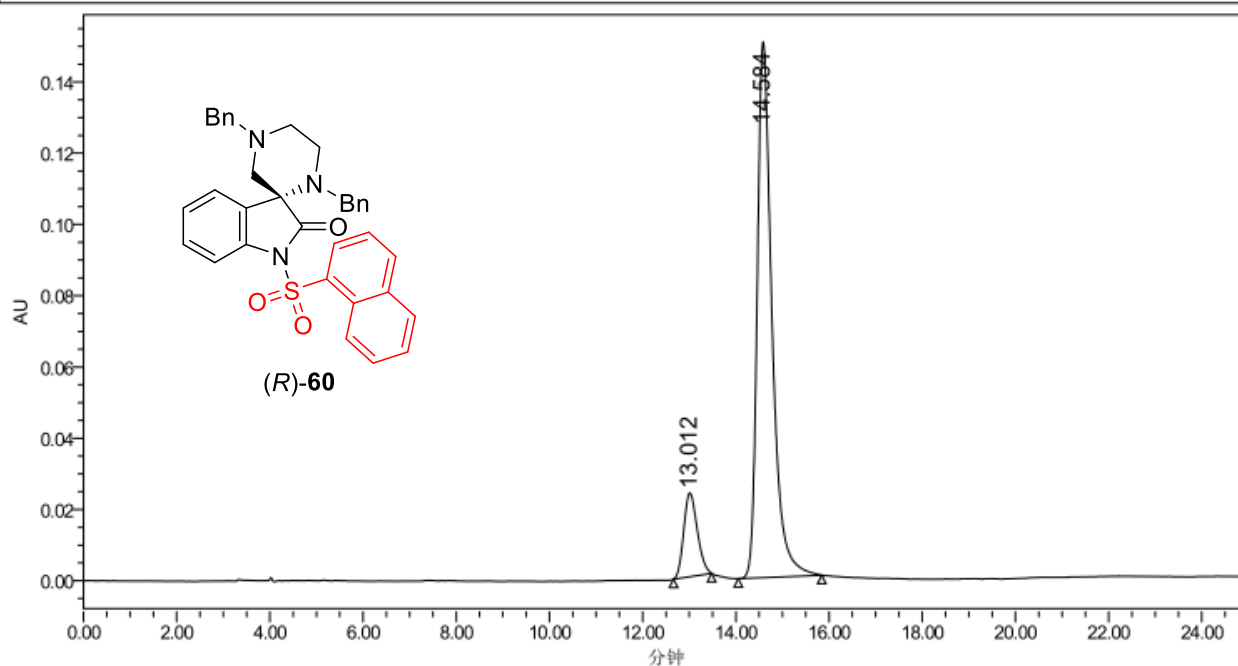

|   | RT<br>(min) | Area    | % Area | Height | % Height |
|---|-------------|---------|--------|--------|----------|
| 1 | 13.012      | 473804  | 12.55  | 23495  | 13.51    |
| 2 | 14.584      | 3301819 | 87.45  | 150396 | 86.49    |

## SUPPORTING INFORMATION

## SAMPLE INFORMATION

Sample Name: ZX\_P528 IA 20VS80  
Sample Type: 未知  
Vial: 1:A,8  
Injection #: 1  
Injection Volume: 10.00 ul  
Run Time: 20.00 Minutes  
Column Type:

Acquired By: Breeze  
Date Acquired: 2023/9/27 15:35:17 CST  
Acq. Method: 20vs80  
Date Processed: 2023/9/27 16:01:05 CST  
Channel Name: 250.0 纳米  
Channel Desc.: 2998 (210-400)纳米  
Sample Set Name: XWD

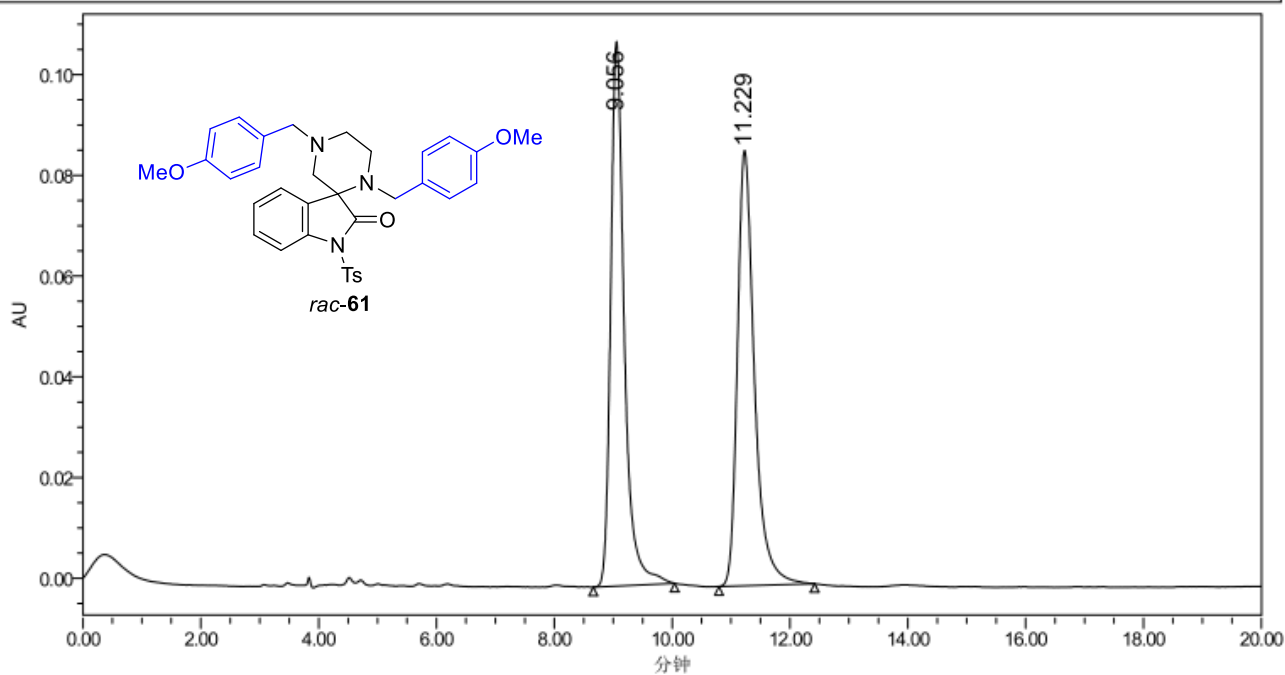

|   | RT<br>(min) | Area    | % Area | Height | % Height |
|---|-------------|---------|--------|--------|----------|
| 1 | 9.056       | 1735402 | 50.01  | 108133 | 55.57    |
| 2 | 11.229      | 1734733 | 49.99  | 86455  | 44.43    |

## SUPPORTING INFORMATION

## SAMPLE INFORMATION

Sample Name: XWD\_P537 IA 20VS80  
Sample Type: 未知  
Vial: 1:A,7  
Injection #: 1  
Injection Volume: 10.00 ul  
Run Time: 20.00 Minutes  
Column Type:

Acquired By: Breeze  
Date Acquired: 2023/9/27 15:14:54 CST  
Acq. Method: 20vs80  
Date Processed: 2023/9/27 15:38:54 CST  
Channel Name: 250.0 纳米  
Channel Desc.: 2998 (210-400)纳米  
Sample Set Name: XWD

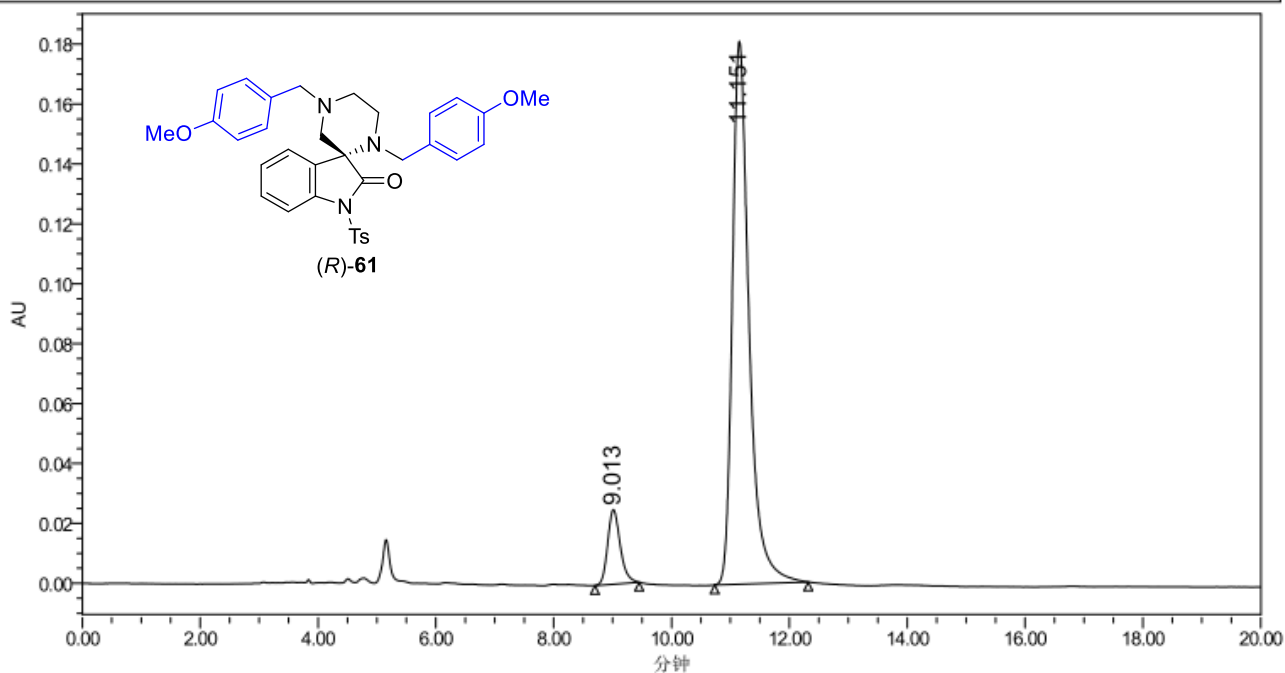

|   | RT<br>(min) | Area    | % Area | Height | % Height |
|---|-------------|---------|--------|--------|----------|
| 1 | 9.013       | 368082  | 9.34   | 24892  | 12.07    |
| 2 | 11.151      | 3572806 | 90.66  | 181295 | 87.93    |

## SUPPORTING INFORMATION

## SAMPLE INFORMATION

Sample Name: ZX\_P526 IA 20VS80

Acquired By: Breeze

Sample Type: 未知

Date Acquired: 2023/9/27 16:31:59 CST

Vial: 1:A,2

Acq. Method: 20vs80

Injection #: 1

Date Processed: 2023/9/27 16:56:15 CST

Injection Volume: 10.00 ul

Channel Name: 230.0 纳米

Run Time: 20.00 Minutes

Channel Desc.: 2998 (210-400)纳米

Column Type:

Sample Set Name: XWD

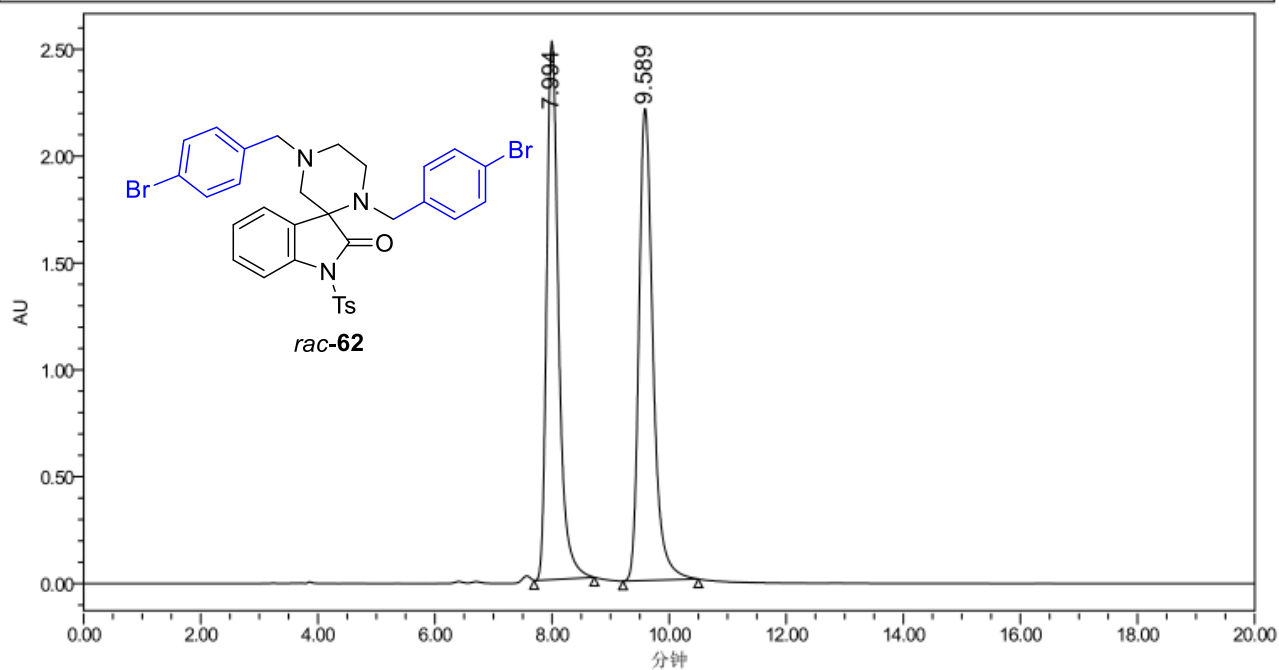

|   | RT<br>(min) | Area     | % Area | Height  | % Height |
|---|-------------|----------|--------|---------|----------|
| 1 | 7.994       | 35603152 | 49.16  | 2520274 | 53.30    |
| 2 | 9.589       | 36821190 | 50.84  | 2208370 | 46.70    |

## SUPPORTING INFORMATION

## SAMPLE INFORMATION

Sample Name: XWD\_P535 IA 20VS80

Acquired By: Breeze

Sample Type: 未知

Date Acquired: 2023/9/27 16:11:35 CST

Vial: 1:A,1

Acq. Method: 20vs80

Injection #: 1

Date Processed: 2023/9/27 16:41:57 CST

Injection Volume: 10.00 ul

Channel Name: 230.0 纳米

Run Time: 20.00 Minutes

Channel Desc.: 2998 (210-400) 纳米

Column Type:

Sample Set Name: XWD

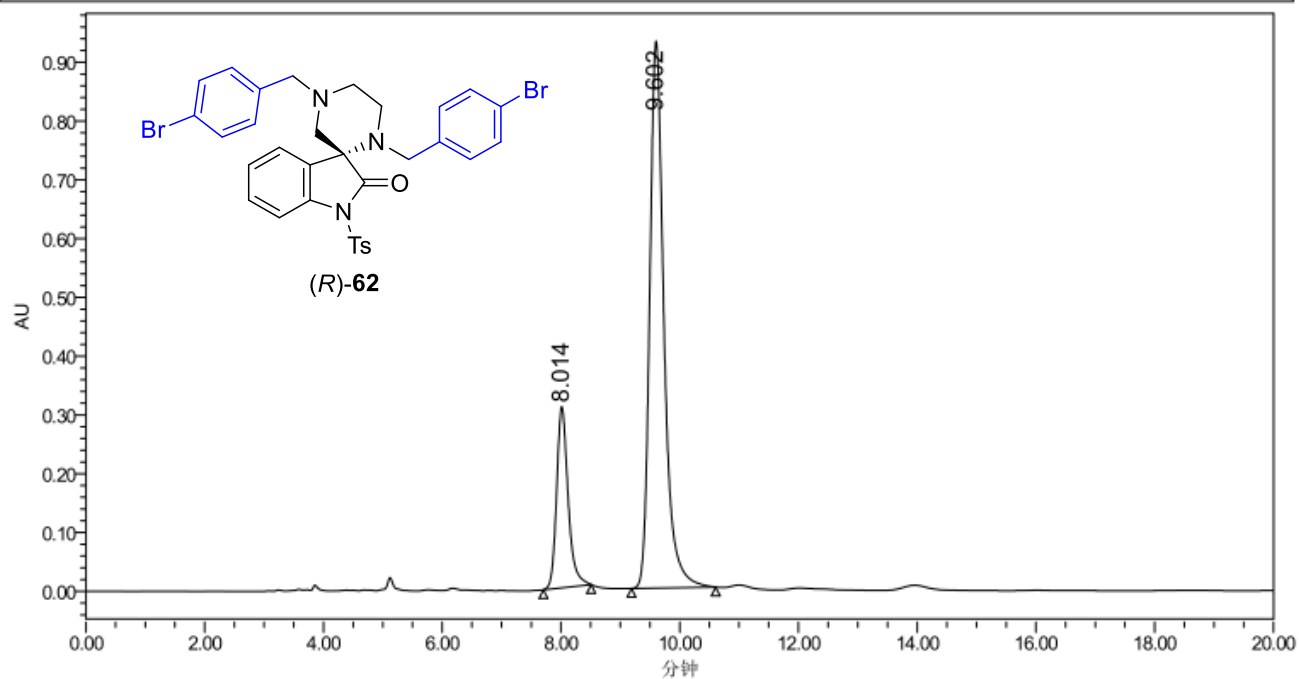

|   | RT<br>(min) | Area     | % Area | Height | % Height |
|---|-------------|----------|--------|--------|----------|
| 1 | 8.014       | 4141180  | 21.07  | 308086 | 24.87    |
| 2 | 9.602       | 15517487 | 78.93  | 930623 | 75.13    |

SUPPORTING INFORMATION

SAMPLE INFORMATION

Sample Name: ZX\_P530 IA 5VS95

Sample Type: 未知

Vial: 1:A,6

Injection #: 1

Injection Volume: 10.00 ul

Run Time: 30.00 Minutes

Column Type:

Acquired By: Breeze

Date Acquired: 2023/9/27 19:34:24 CST

Acq. Method: 5vs95

Date Processed: 2023/9/27 20:17:11 CST

Channel Name: 254.0 纳米

Channel Desc.: 2998 (210-400)纳米

Sample Set Name: XWD

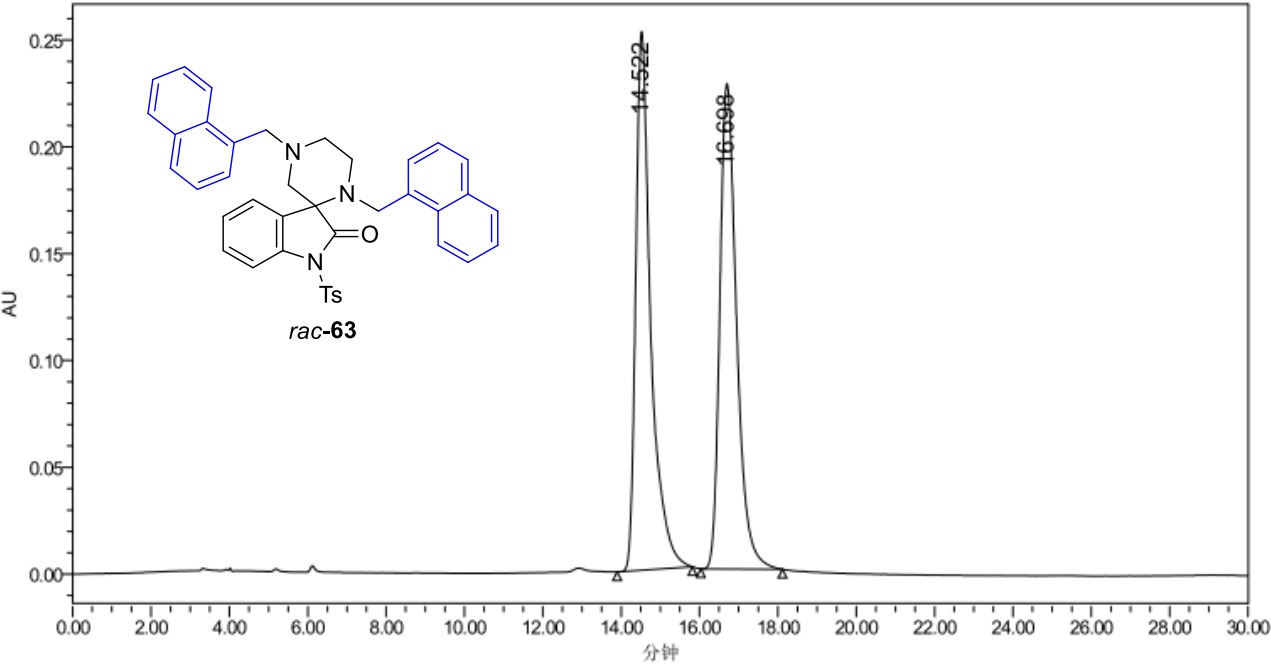

|   | RT<br>(min) | Area    | % Area | Height | % Height |
|---|-------------|---------|--------|--------|----------|
| 1 | 14.522      | 6706093 | 49.86  | 252187 | 52.60    |
| 2 | 16.698      | 6742875 | 50.14  | 227216 | 47.40    |

## SUPPORTING INFORMATION

## SAMPLE INFORMATION

|                   |                   |                  |                        |
|-------------------|-------------------|------------------|------------------------|
| Sample Name:      | XWD_P539 IA 5VS95 | Acquired By:     | Breeze                 |
| Sample Type:      | 未知                | Date Acquired:   | 2023/9/27 18:29:53 CST |
| Vial:             | 1:A,5             | Acq. Method:     | 5vs95                  |
| Injection #:      | 1                 | Date Processed:  | 2023/9/27 20:19:58 CST |
| Injection Volume: | 10.00 ul          | Channel Name:    | 254.0 纳米               |
| Run Time:         | 30.00 Minutes     | Channel Desc.:   | 2998 (210-400)纳米       |
| Column Type:      |                   | Sample Set Name: | XWD                    |

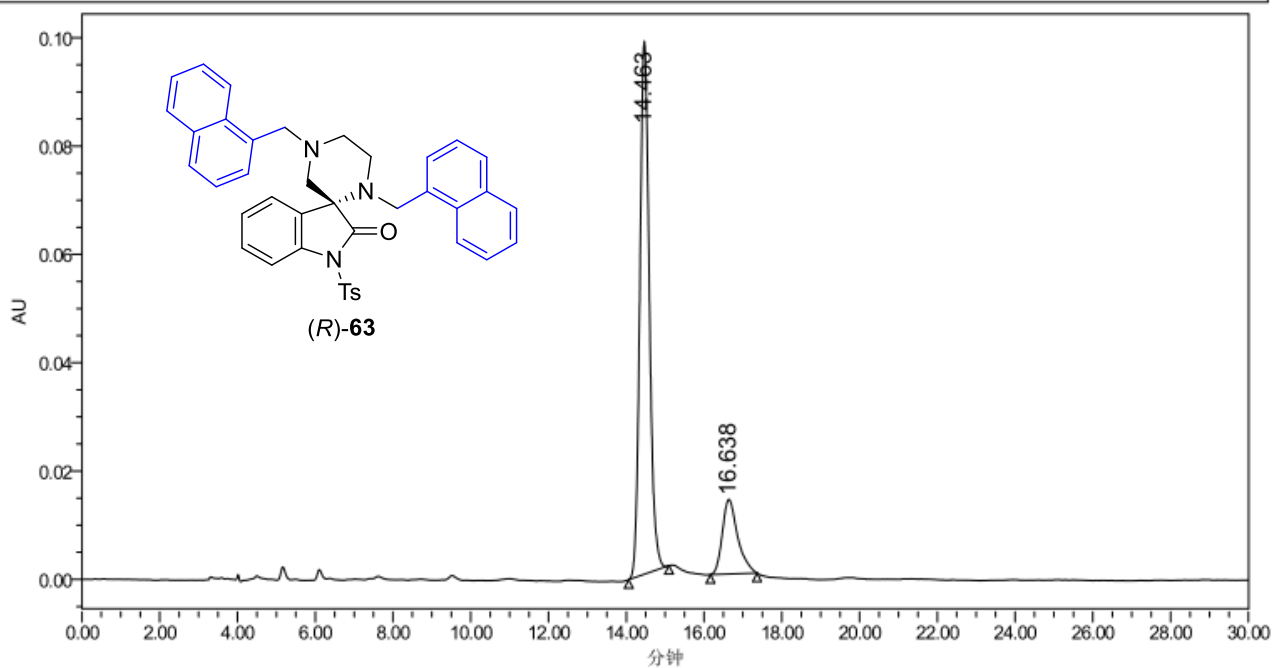

|   | RT<br>(min) | Area    | % Area | Height | % Height |
|---|-------------|---------|--------|--------|----------|
| 1 | 14.463      | 1658707 | 81.50  | 98434  | 87.74    |
| 2 | 16.638      | 376564  | 18.50  | 13750  | 12.26    |

SUPPORTING INFORMATION

SAMPLE INFORMATION

Sample Name: ZX\_P586 IA 20VS80

Sample Type: 未知

Vial: 1:A,2

Injection #: 1

Injection Volume: 10.00 ul

Run Time: 20.00 Minutes

Column Type:

Acquired By: Breeze

Date Acquired: 2023/9/18 10:44:32 CST

Acq. Method: 20vs80

Date Processed: 2023/9/18 11:09:41 CST

Channel Name: 310.0 纳米

Channel Desc.: 2998 (210-400)纳米

Sample Set Name: XWD

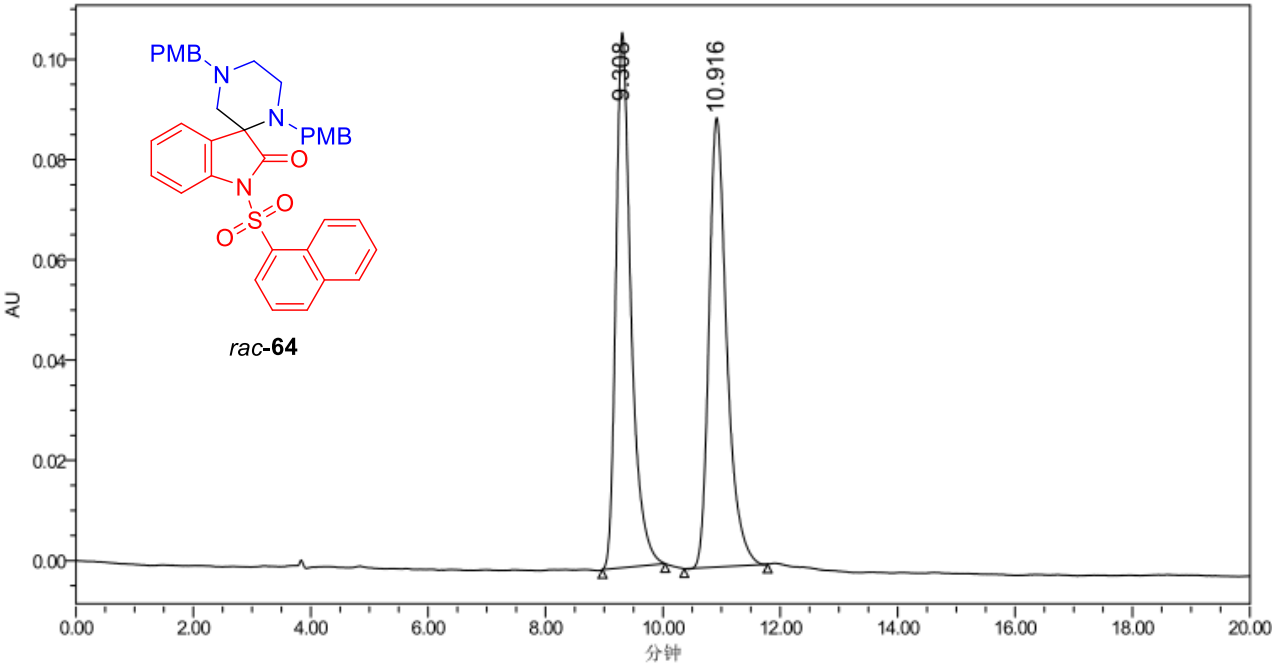

|   | RT<br>(min) | Area    | % Area | Height | % Height |
|---|-------------|---------|--------|--------|----------|
| 1 | 9.308       | 1909787 | 50.14  | 106751 | 54.37    |
| 2 | 10.916      | 1898906 | 49.86  | 89588  | 45.63    |



| SAMPLE INFORMATION |                    |                  |                        |  |  |
|--------------------|--------------------|------------------|------------------------|--|--|
| Sample Name:       | XWD_P601 IA 20VS80 | Acquired By:     | Breeze                 |  |  |
| Sample Type:       | 未知                 | Date Acquired:   | 2023/9/18 10:24:10 CST |  |  |
| Vial:              | 1:A,1              | Acq. Method:     | 20vs80                 |  |  |
| Injection #:       | 1                  | Date Processed:  | 2023/9/18 11:30:12 CST |  |  |
| Injection Volume:  | 10.00 ul           | Channel Name:    | 310.0 纳米               |  |  |
| Run Time:          | 20.00 Minutes      | Channel Desc.:   | 2998 (210-400)纳米       |  |  |
| Column Type:       |                    | Sample Set Name: | XWD                    |  |  |

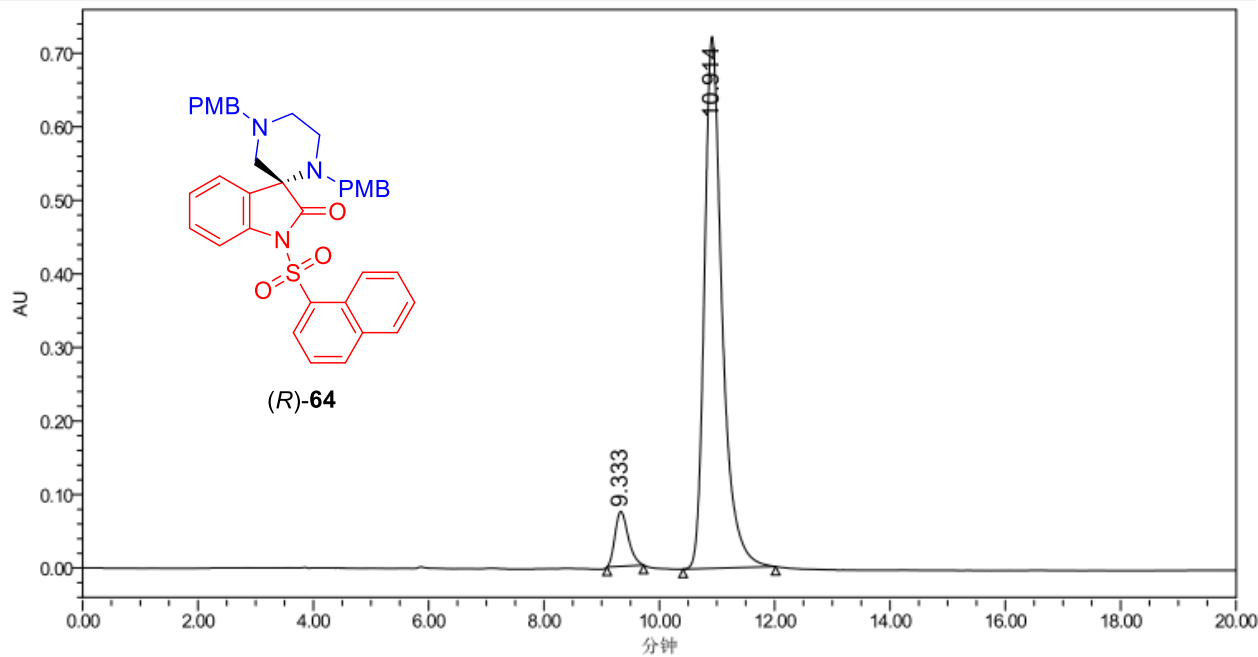

|   | RT<br>(min) | Area     | % Area | Height | % Height |
|---|-------------|----------|--------|--------|----------|
| 1 | 9.333       | 1188375  | 7.12   | 74608  | 9.35     |
| 2 | 10.914      | 15507177 | 92.88  | 723412 | 90.65    |

SUPPORTING INFORMATION

| SAMPLE INFORMATION |                    |                  |                        |  |  |
|--------------------|--------------------|------------------|------------------------|--|--|
| Sample Name:       | XWD_P636 IE 30VS70 | Acquired By:     | Breeze                 |  |  |
| Sample Type:       | 未知                 | Date Acquired:   | 2023/9/22 19:57:40 CST |  |  |
| Vial:              | 1:A,2              | Acq. Method:     | 30vs70                 |  |  |
| Injection #:       | 1                  | Date Processed:  | 2023/9/22 21:53:11 CST |  |  |
| Injection Volume:  | 10.00 ul           | Channel Name:    | 310.0 纳米               |  |  |
| Run Time:          | 45.00 Minutes      | Channel Desc.:   | 2998 (210-400)纳米       |  |  |
| Column Type:       |                    | Sample Set Name: | XWD                    |  |  |

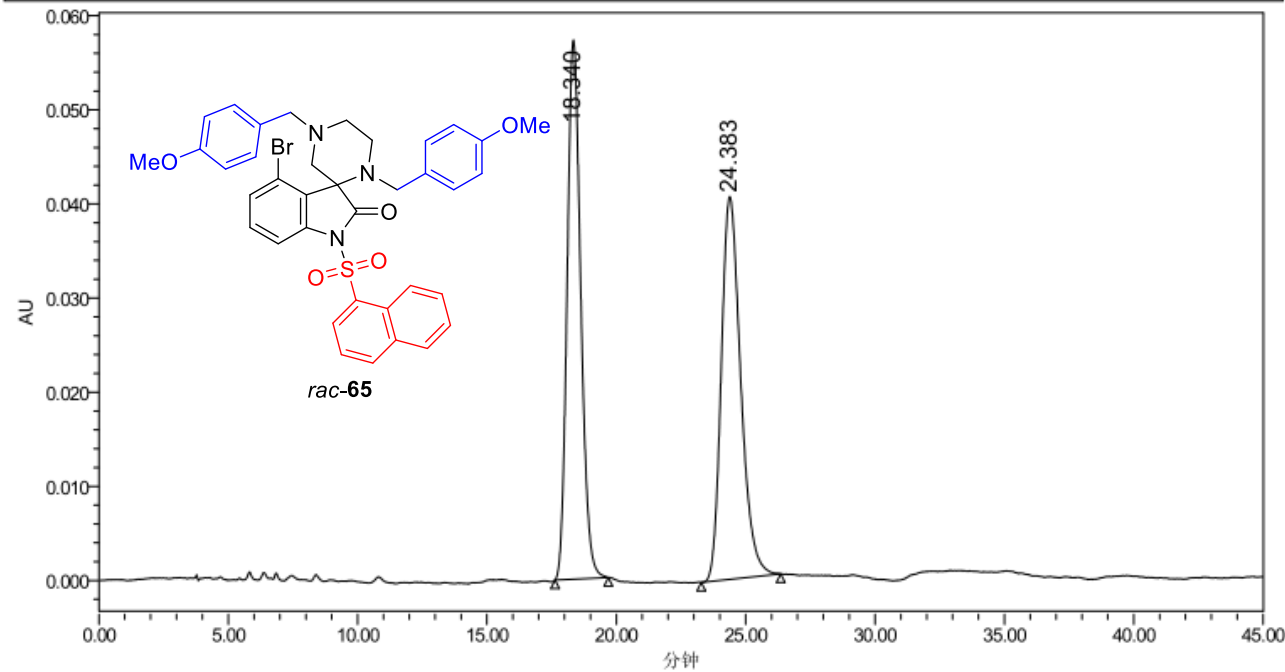

|   | RT<br>(min) | Area    | % Area | Height | % Height |
|---|-------------|---------|--------|--------|----------|
| 1 | 18.340      | 2093089 | 49.66  | 57274  | 58.48    |
| 2 | 24.383      | 2121947 | 50.34  | 40672  | 41.52    |

## SUPPORTING INFORMATION

## SAMPLE INFORMATION

Sample Name: XWD\_P641\_2 IE 30VS70

Acquired By: Breeze

Sample Type: 未知

Date Acquired: 2023/9/22 19:12:17 CST

Vial: 1:A,1

Acq. Method: 30vs70

Injection #: 1

Date Processed: 2023/9/22 21:53:39 CST

Injection Volume: 10.00 ul

Channel Name: 310.0 纳米

Run Time: 45.00 Minutes

Channel Desc.: 2998 (210-400)纳米

Column Type:

Sample Set Name: XWD

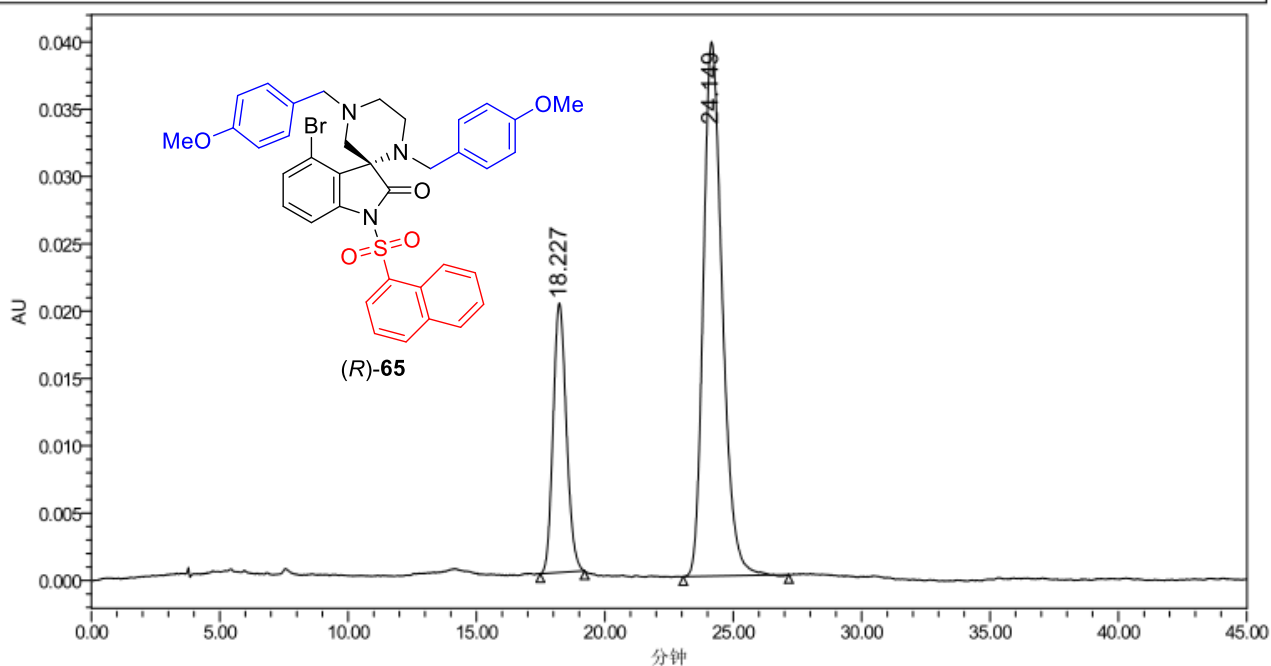

|   | RT<br>(min) | Area    | % Area | Height | % Height |
|---|-------------|---------|--------|--------|----------|
| 1 | 18.227      | 716900  | 26.05  | 19998  | 33.51    |
| 2 | 24.149      | 2034973 | 73.95  | 39680  | 66.49    |

SUPPORTING INFORMATION

SAMPLE INFORMATION

Sample Name: XWD\_P663\_1 IA 20VS80

Sample Type: 未知

Vial: 1:A,4

Injection #: 1

Injection Volume: 10.00 ul

Run Time: 20.00 Minutes

Column Type:

Acquired By: Breeze

Date Acquired: 2023/9/18 11:28:01 CST

Acq. Method: 20vs80

Date Processed: 2023/9/18 12:05:34 CST

Channel Name: 280.0 纳米

Channel Desc.: 2998 (210-400)纳米

Sample Set Name: XWD

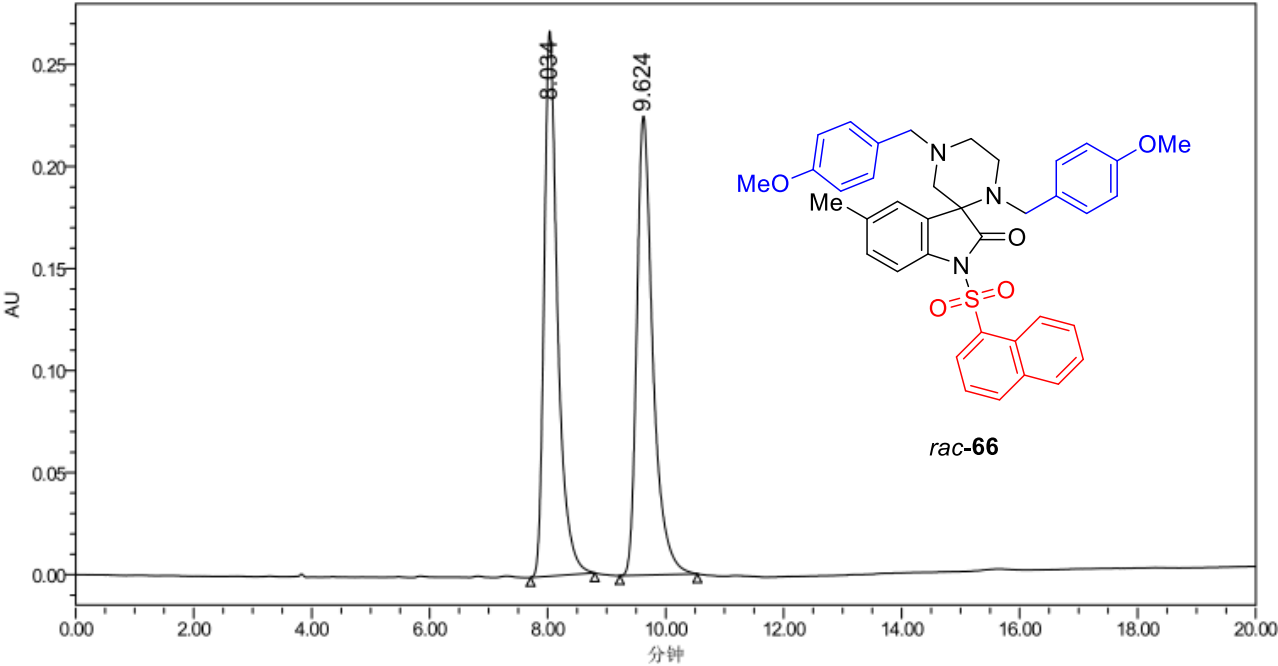

|   | RT<br>(min) | Area    | % Area | Height | % Height |
|---|-------------|---------|--------|--------|----------|
| 1 | 8.034       | 4242963 | 49.87  | 267078 | 54.28    |
| 2 | 9.624       | 4265557 | 50.13  | 224976 | 45.72    |

## SUPPORTING INFORMATION

## SAMPLE INFORMATION

|                   |                      |                  |                        |
|-------------------|----------------------|------------------|------------------------|
| Sample Name:      | XWD_P663_2 IA 20VS80 | Acquired By:     | Breeze                 |
| Sample Type:      | 未知                   | Date Acquired:   | 2023/9/18 11:07:38 CST |
| Vial:             | 1:A,3                | Acq. Method:     | 20vs80                 |
| Injection #:      | 1                    | Date Processed:  | 2023/9/18 11:33:50 CST |
| Injection Volume: | 10.00 ul             | Channel Name:    | 280.0 纳米               |
| Run Time:         | 20.00 Minutes        | Channel Desc.:   | 2998 (210-400)纳米       |
| Column Type:      |                      | Sample Set Name: | XWD                    |

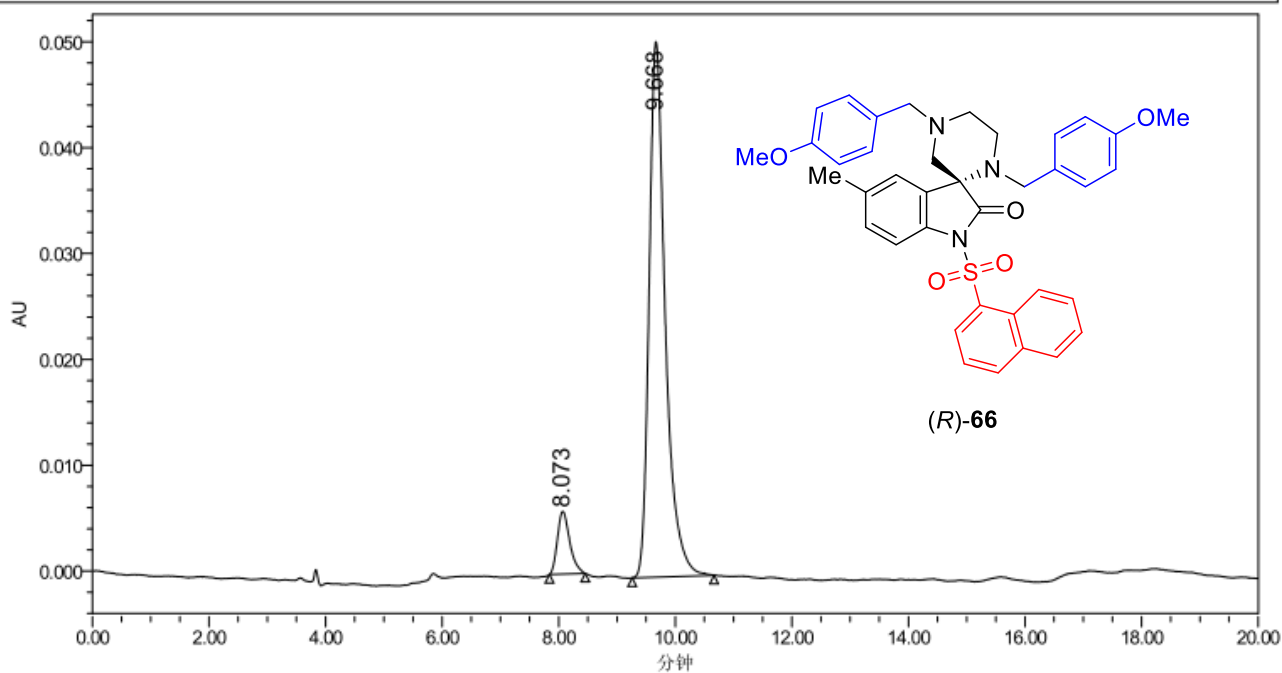

|   | RT<br>(min) | Area   | % Area | Height | % Height |
|---|-------------|--------|--------|--------|----------|
| 1 | 8.073       | 86903  | 8.19   | 5903   | 10.45    |
| 2 | 9.668       | 973777 | 91.81  | 50584  | 89.55    |

SUPPORTING INFORMATION

SAMPLE INFORMATION

Sample Name: XWD\_P634 IA 30VS70

Sample Type: 未知

Vial: 1:A,2

Injection #: 1

Injection Volume: 10.00 ul

Run Time: 28.00 Minutes

Column Type:

Acquired By: Breeze

Date Acquired: 2023/9/18 13:00:22 CST

Acq. Method: 30vs70

Date Processed: 2023/9/18 14:28:51 CST

Channel Name: 220.0 纳米

Channel Desc.: 2998 (210-400)纳米

Sample Set Name: XWD

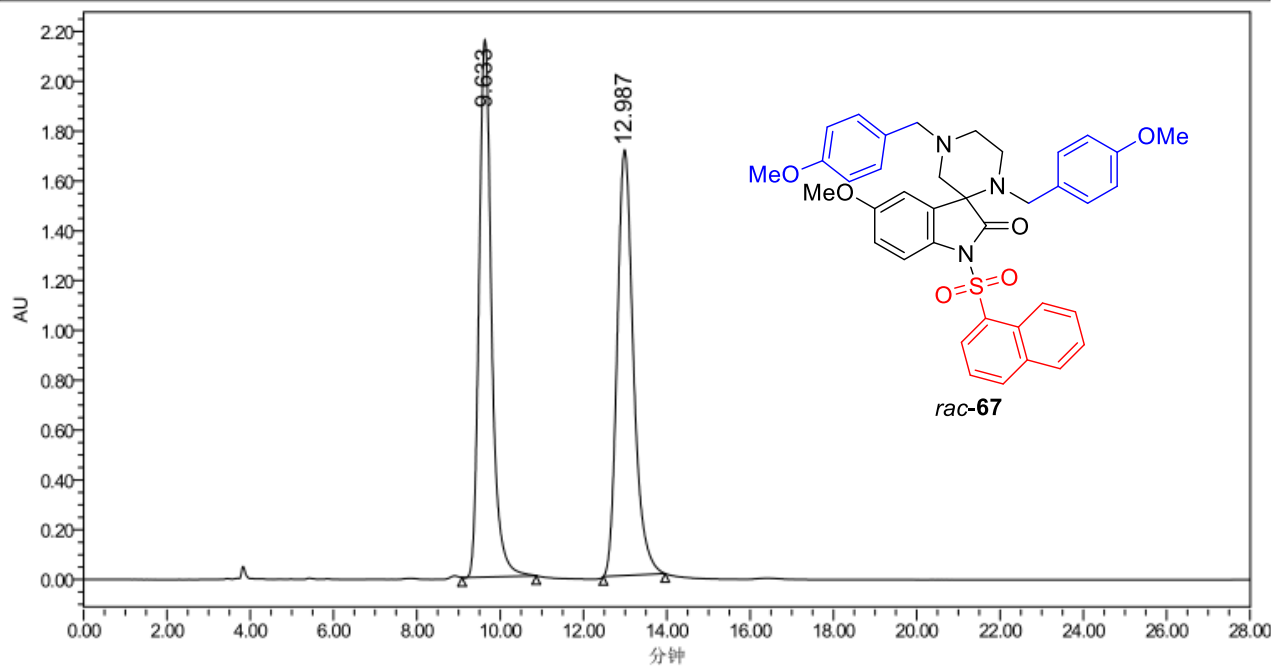

|   | RT<br>(min) | Area     | % Area | Height  | % Height |
|---|-------------|----------|--------|---------|----------|
| 1 | 9.633       | 45312022 | 49.41  | 2159081 | 55.81    |
| 2 | 12.987      | 46392729 | 50.59  | 1709432 | 44.19    |

SAMPLE INFORMATION

|                   |                      |                  |                        |
|-------------------|----------------------|------------------|------------------------|
| Sample Name:      | XWD_P639_2 IA 30VS70 | Acquired By:     | Breeze                 |
| Sample Type:      | 未知                   | Date Acquired:   | 2023/9/18 13:28:45 CST |
| Vial:             | 1:A,3                | Acq. Method:     | 30vs70                 |
| Injection #:      | 1                    | Date Processed:  | 2023/9/18 14:25:36 CST |
| Injection Volume: | 10.00 ul             | Channel Name:    | 220.0 纳米               |
| Run Time:         | 28.00 Minutes        | Channel Desc.:   | 2998 (210-400)纳米       |
| Column Type:      |                      | Sample Set Name: | XWD                    |

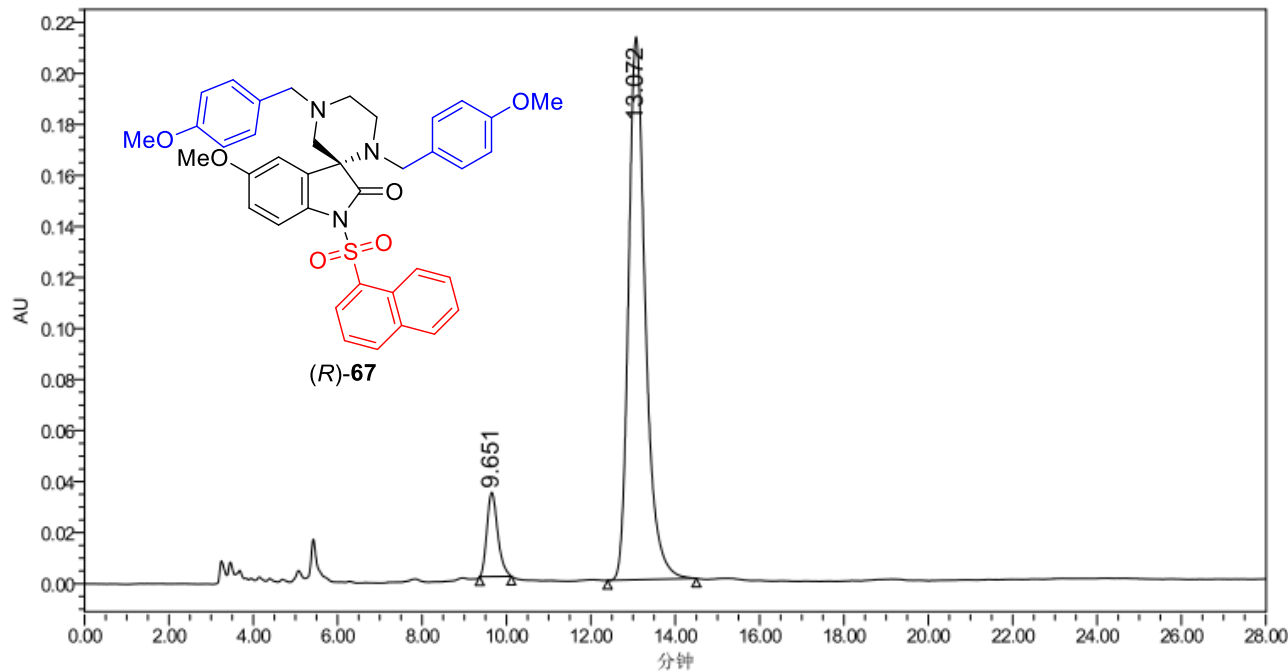

|   | RT<br>(min) | Area    | % Area | Height | % Height |
|---|-------------|---------|--------|--------|----------|
| 1 | 9.651       | 588676  | 9.07   | 32945  | 13.41    |
| 2 | 13.072      | 5899692 | 90.93  | 212790 | 86.59    |

SUPPORTING INFORMATION

SAMPLE INFORMATION

Sample Name: XWD\_P635 IA 20VS80

Sample Type: 未知

Vial: 1:A,2

Injection #: 1

Injection Volume: 10.00 ul

Run Time: 20.00 Minutes

Column Type:

Acquired By: Breeze

Date Acquired: 2023/9/18 15:05:44 CST

Acq. Method: 20vs80

Date Processed: 2023/9/18 16:08:49 CST

Channel Name: 230.0 纳米

Channel Desc.: 2998 (210-400)纳米

Sample Set Name: XWD

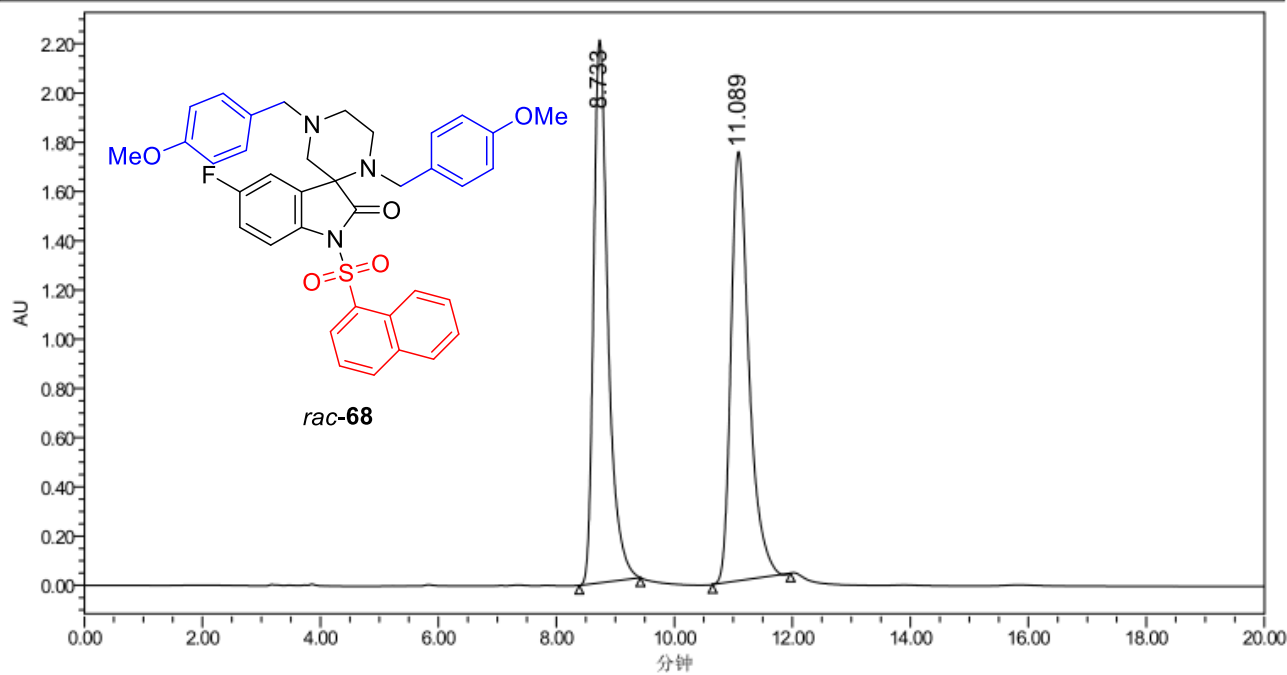

|   | RT<br>(min) | Area     | % Area | Height  | % Height |
|---|-------------|----------|--------|---------|----------|
| 1 | 8.733       | 37418550 | 50.24  | 2205818 | 55.86    |
| 2 | 11.089      | 37058936 | 49.76  | 1743204 | 44.14    |



## SUPPORTING INFORMATION

## SAMPLE INFORMATION

Sample Name: XWD\_P640 IA 20VS80  
Sample Type: 未知  
Vial: 1:A,3  
Injection #: 1  
Injection Volume: 10.00 ul  
Run Time: 20.00 Minutes  
Column Type:

Acquired By: Breeze  
Date Acquired: 2023/9/18 15:26:07 CST  
Acq. Method: 20vs80  
Date Processed: 2023/9/18 16:05:06 CST  
Channel Name: 230.0 纳米  
Channel Desc.: 2998 (210-400) 纳米  
Sample Set Name: XWD

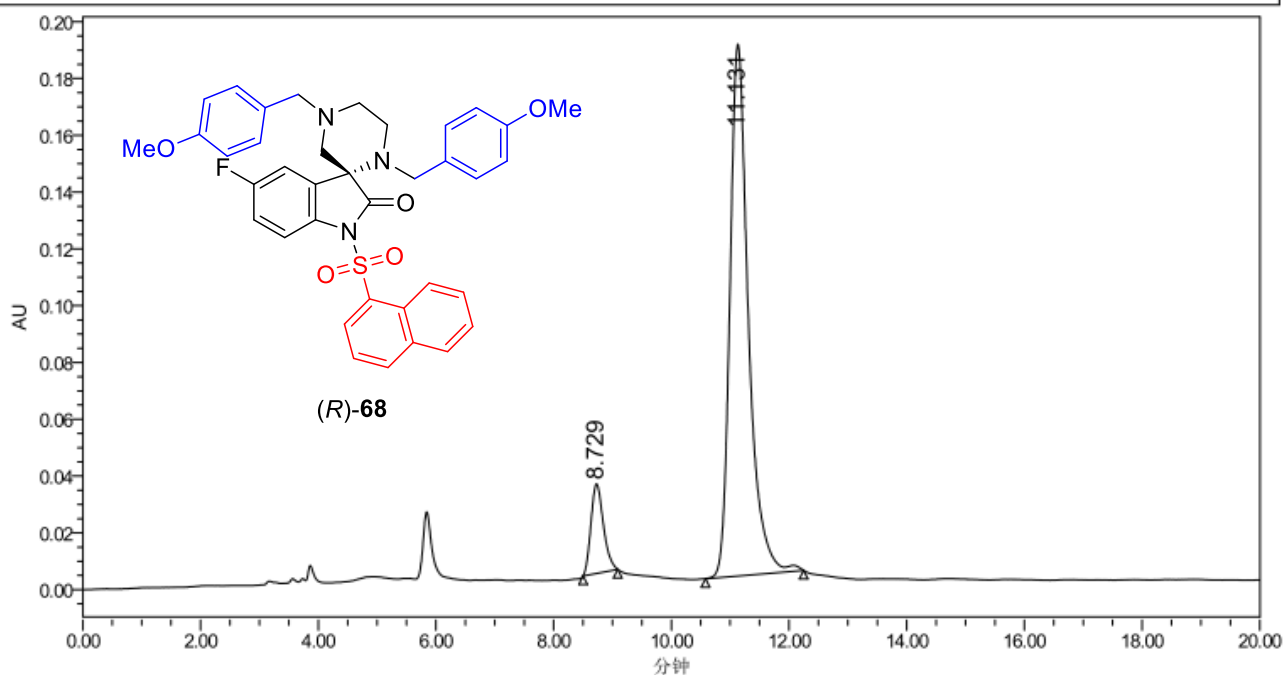

|   | RT<br>(min) | Area    | % Area | Height | % Height |
|---|-------------|---------|--------|--------|----------|
| 1 | 8.729       | 464166  | 10.19  | 31497  | 14.40    |
| 2 | 11.131      | 4090799 | 89.81  | 187267 | 85.60    |

SUPPORTING INFORMATION

SAMPLE INFORMATION

Sample Name: XWD\_P662\_1 IE 30VS70

Sample Type: 未知

Vial: 1:A,2

Injection #: 1

Injection Volume: 10.00 ul

Run Time: 50.00 Minutes

Column Type:

Acquired By: Breeze

Date Acquired: 2023/9/24 17:41:15 CST

Acq. Method: 30vs70

Date Processed: 2023/9/24 18:37:29 CST

Channel Name: 310.0 纳米

Channel Desc.: 2998 (210-400)纳米

Sample Set Name: XWD

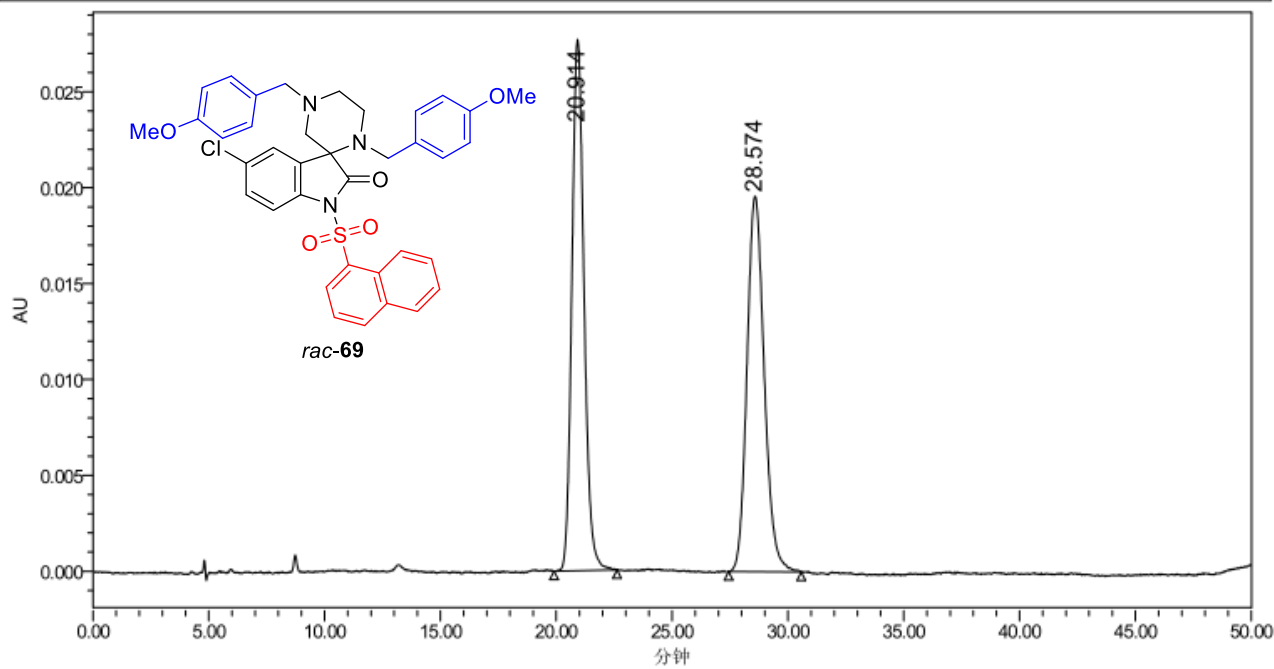

|   | RT<br>(min) | Area    | % Area | Height | % Height |
|---|-------------|---------|--------|--------|----------|
| 1 | 20.914      | 1007227 | 49.84  | 27700  | 58.60    |
| 2 | 28.574      | 1013735 | 50.16  | 19572  | 41.40    |

| SAMPLE INFORMATION |                      |                  |                        |  |  |
|--------------------|----------------------|------------------|------------------------|--|--|
| Sample Name:       | XWD_P662_2 IE 30VS70 | Acquired By:     | Breeze                 |  |  |
| Sample Type:       | 未知                   | Date Acquired:   | 2023/9/24 16:50:53 CST |  |  |
| Vial:              | 1:A,1                | Acq. Method:     | 30vs70                 |  |  |
| Injection #:       | 1                    | Date Processed:  | 2023/9/24 18:33:50 CST |  |  |
| Injection Volume:  | 10.00 ul             | Channel Name:    | 310.0 纳米               |  |  |
| Run Time:          | 50.00 Minutes        | Channel Desc.:   | 2998 (210-400)纳米       |  |  |
| Column Type:       |                      | Sample Set Name: | XWD                    |  |  |

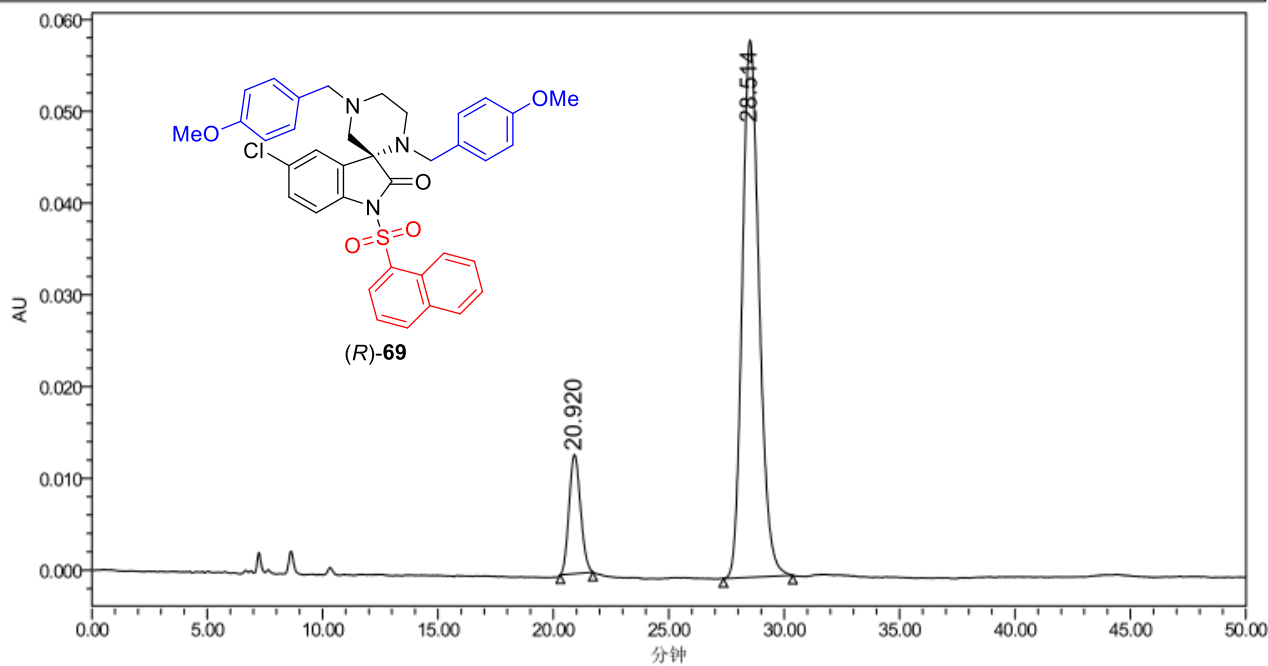

|   | RT (min) | Area    | % Area | Height | % Height |
|---|----------|---------|--------|--------|----------|
| 1 | 20.920   | 449097  | 13.11  | 12948  | 18.11    |
| 2 | 28.514   | 2977156 | 86.89  | 58551  | 81.89    |

SUPPORTING INFORMATION

| SAMPLE INFORMATION |                   |  |                  |                         |  |
|--------------------|-------------------|--|------------------|-------------------------|--|
| Sample Name:       | XWD_P637 IE 30/70 |  | Acquired By:     | Breeze                  |  |
| Sample Type:       | 未知                |  | Date Acquired:   | 2024/11/29 13:49:19 CST |  |
| Vial:              | 1:B,2             |  | Acq. Method:     | 30vs70                  |  |
| Injection #:       | 1                 |  | Date Processed:  | 2024/12/5 8:19:02 CST   |  |
| Injection Volume:  | 5.00 ul           |  | Channel Name:    | 254.4 纳米                |  |
| Run Time:          | 40.00 Minutes     |  | Channel Desc.:   | 2998 (210-400)纳米        |  |
| Column Type:       |                   |  | Sample Set Name: | LYC                     |  |

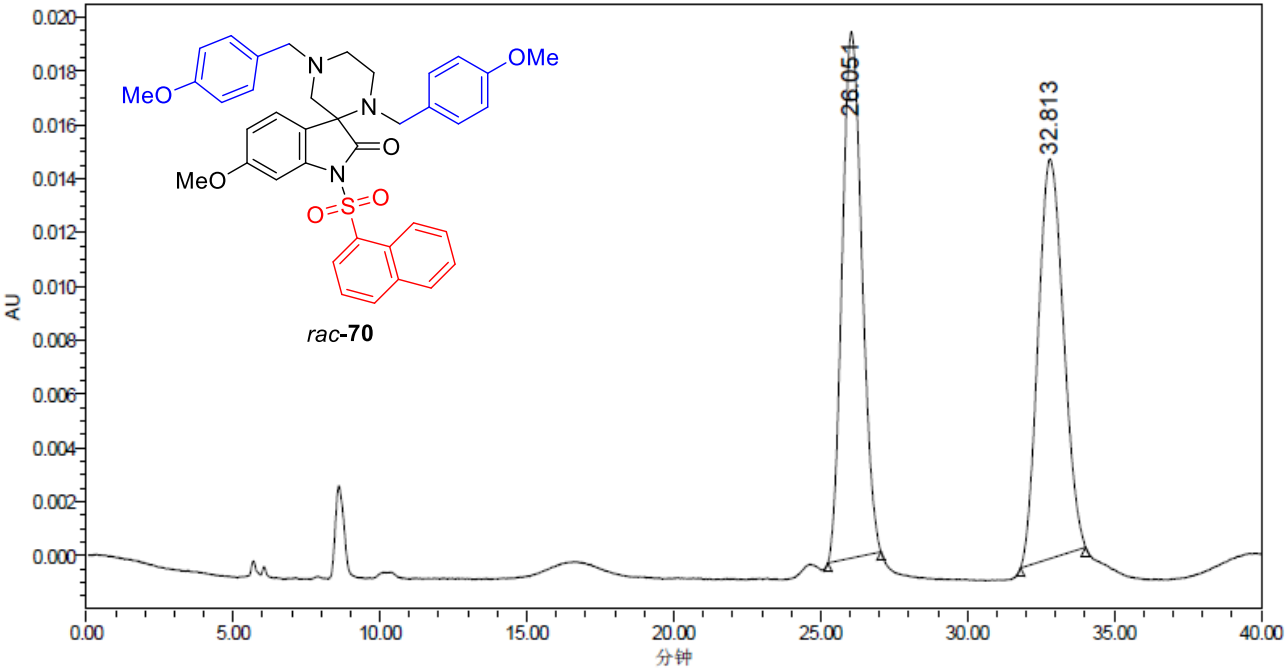

|   | RT<br>(min) | Area<br>(面积*sec) | % Area | Height<br>(面积) | % Height |
|---|-------------|------------------|--------|----------------|----------|
| 1 | 26.051      | 916402           | 50.69  | 19537          | 56.81    |
| 2 | 32.813      | 891276           | 49.31  | 14853          | 43.19    |

SUPPORTING INFORMATION

SAMPLE INFORMATION

Sample Name: XWD\_P642 IE 30/70

Sample Type: 未知

Vial: 1:B,1

Injection #: 1

Injection Volume: 5.00 ul

Run Time: 40.00 Minutes

Column Type:

Acquired By: Breeze

Date Acquired: 2024/11/29 13:08:56 CST

Acq. Method: 30vs70

Date Processed: 2024/12/5 8:20:38 CST

Channel Name: 260.0 纳米

Channel Desc.: 2998 (210-400)纳米

Sample Set Name: LYC

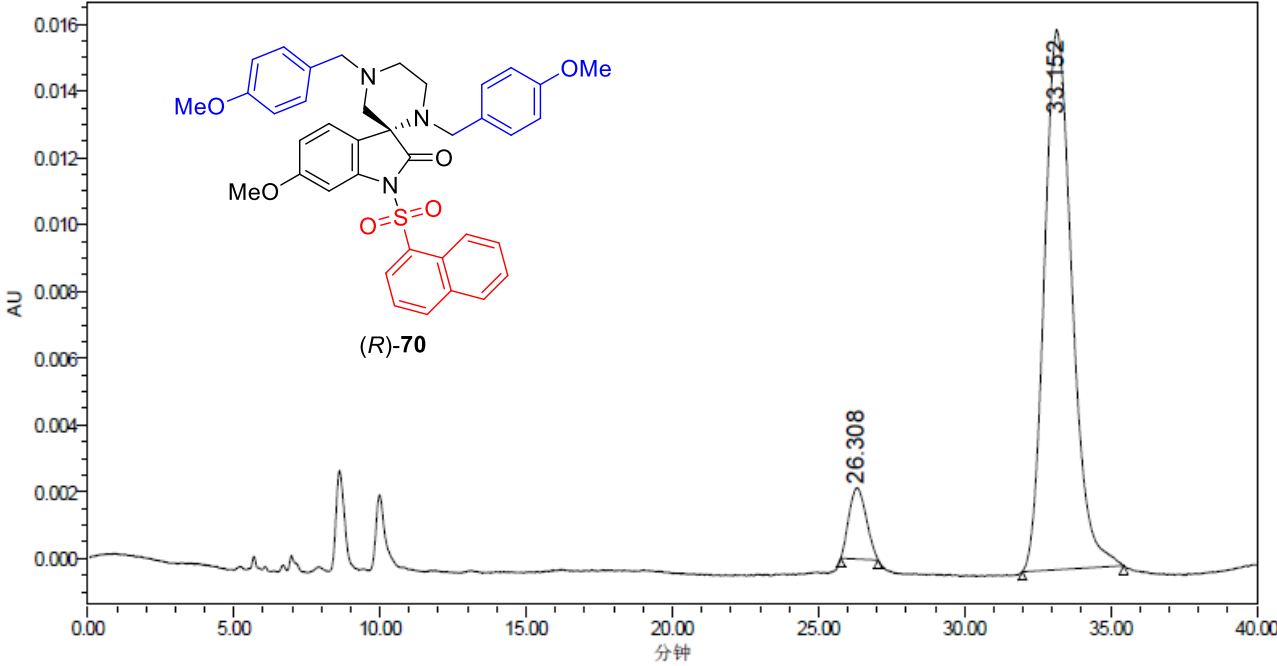

|   | RT<br>(min) | Area<br>(峰*sec) | % Area | Height<br>(峰) | % Height |
|---|-------------|-----------------|--------|---------------|----------|
| 1 | 26.308      | 86938           | 7.57   | 2135          | 11.67    |
| 2 | 33.152      | 1061154         | 92.43  | 16163         | 88.33    |

SUPPORTING INFORMATION

SAMPLE INFORMATION

Sample Name: XWD\_P670\_1 IE 30VS70

Sample Type: 未知

Vial: 1:A,4

Injection #: 1

Injection Volume: 10.00 ul

Run Time: 40.00 Minutes

Column Type:

Acquired By: Breeze

Date Acquired: 2023/9/18 20:09:33 CST

Acq. Method: 30vs70

Date Processed: 2023/9/18 21:37:42 CST

Channel Name: 296.0 纳米

Channel Desc.: 2998 (210-400)纳米

Sample Set Name: XWD

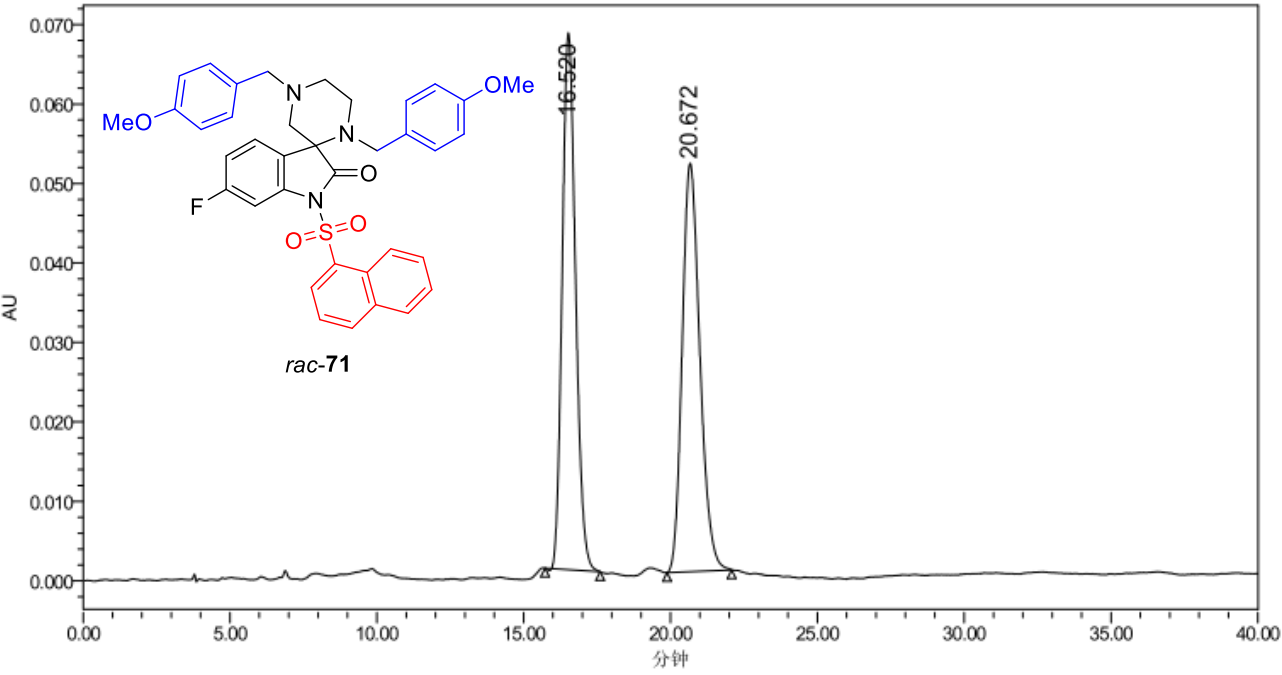

|   | RT<br>(min) | Area    | % Area | Height | % Height |
|---|-------------|---------|--------|--------|----------|
| 1 | 16.520      | 2136983 | 49.84  | 67560  | 56.80    |
| 2 | 20.672      | 2150635 | 50.16  | 51383  | 43.20    |

| SAMPLE INFORMATION |                      |                  |                        |  |  |
|--------------------|----------------------|------------------|------------------------|--|--|
| Sample Name:       | XWD_P670_2 IE 30VS70 | Acquired By:     | Breeze                 |  |  |
| Sample Type:       | 未知                   | Date Acquired:   | 2023/9/18 20:51:37 CST |  |  |
| Vial:              | 1:A,3                | Acq. Method:     | 30vs70                 |  |  |
| Injection #:       | 1                    | Date Processed:  | 2023/9/18 21:36:12 CST |  |  |
| Injection Volume:  | 10.00 ul             | Channel Name:    | 296.0 纳米               |  |  |
| Run Time:          | 40.00 Minutes        | Channel Desc.:   | 2998 (210-400)纳米       |  |  |
| Column Type:       |                      | Sample Set Name: | XWD                    |  |  |

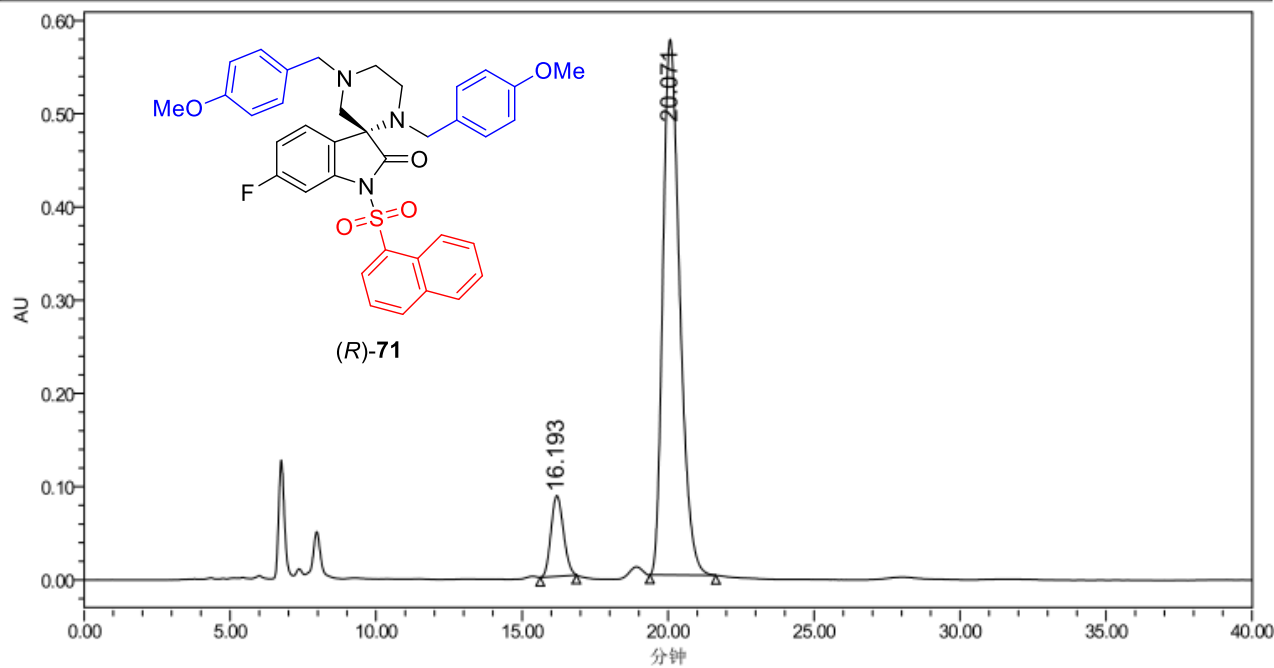

|   | RT (min) | Area     | % Area | Height | % Height |
|---|----------|----------|--------|--------|----------|
| 1 | 16.193   | 2560162  | 10.00  | 86443  | 13.08    |
| 2 | 20.071   | 23033970 | 90.00  | 574629 | 86.92    |

SUPPORTING INFORMATION

SAMPLE INFORMATION

Sample Name: XWD\_P661\_1 IE 30VS70

Sample Type: 未知

Vial: 1:A,2

Injection #: 1

Injection Volume: 10.00 ul

Run Time: 40.00 Minutes

Column Type:

Acquired By: Breeze

Date Acquired: 2023/9/24 21:35:33 CST

Acq. Method: 30vs70

Date Processed: 2023/9/24 22:22:39 CST

Channel Name: 230.0 纳米

Channel Desc.: 2998 (210-400)纳米

Sample Set Name: XWD

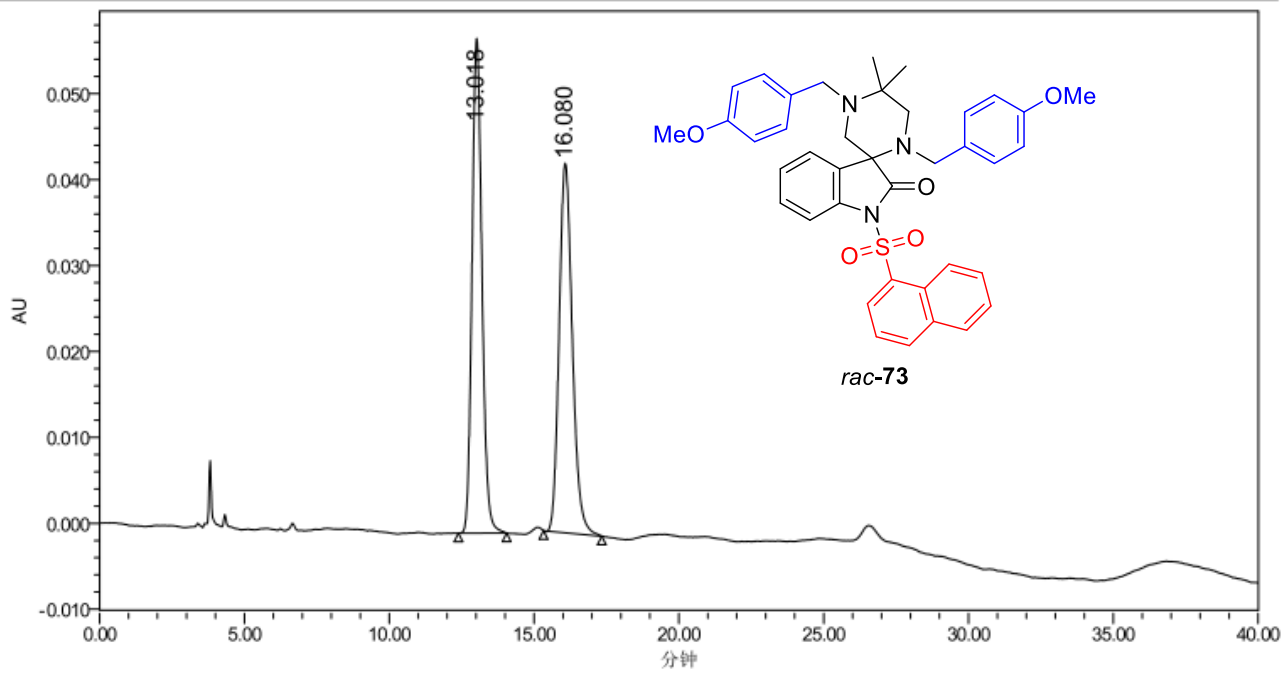

|   | RT<br>(min) | Area    | % Area | Height | % Height |
|---|-------------|---------|--------|--------|----------|
| 1 | 13.018      | 1369748 | 50.09  | 57581  | 57.23    |
| 2 | 16.080      | 1364960 | 49.91  | 43038  | 42.77    |



SUPPORTING INFORMATION

SAMPLE INFORMATION

Sample Name: XWD\_P661\_2 IE 30VS70

Sample Type: 未知

Vial: 1:A,1

Injection #: 1

Injection Volume: 10.00 ul

Run Time: 40.00 Minutes

Column Type:

Acquired By: Breeze

Date Acquired: 2023/9/24 20:55:10 CST

Acq. Method: 30vs70

Date Processed: 2023/9/24 21:41:22 CST

Channel Name: 230.0 纳米

Channel Desc.: 2998 (210-400)纳米

Sample Set Name: XWD

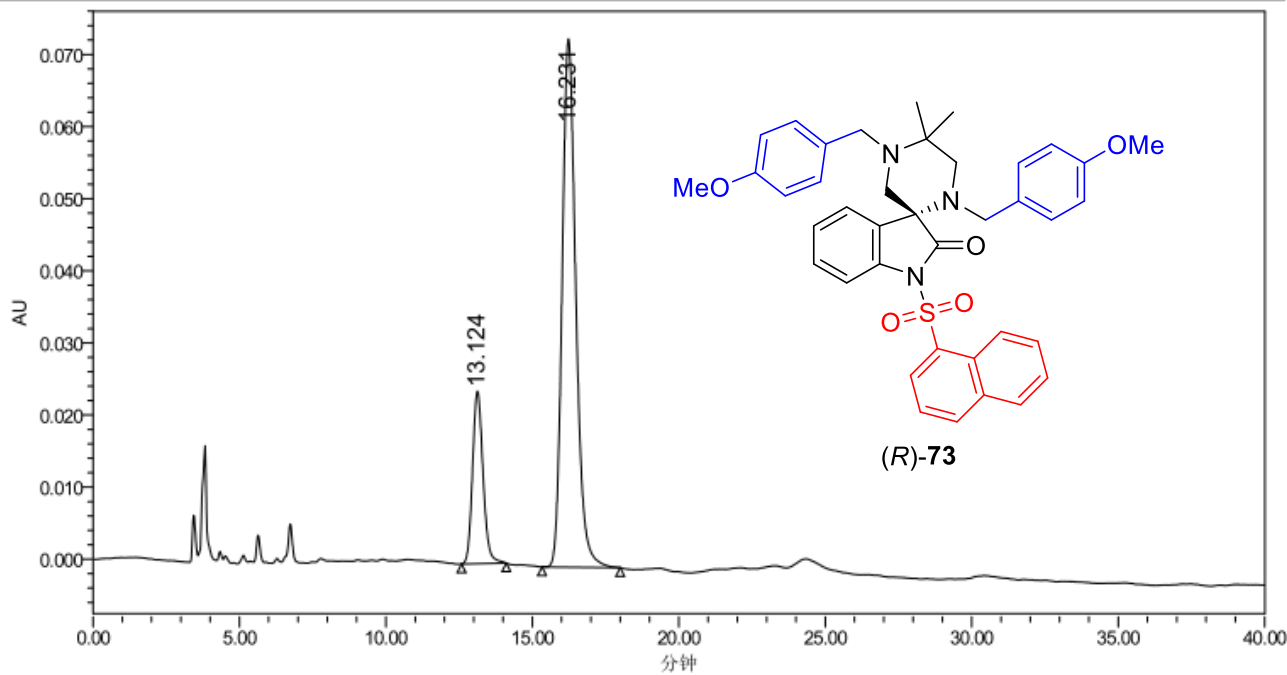

|   | RT<br>(min) | Area    | % Area | Height | % Height |
|---|-------------|---------|--------|--------|----------|
| 1 | 13.124      | 594164  | 19.96  | 23906  | 24.60    |
| 2 | 16.231      | 2382960 | 80.04  | 73272  | 75.40    |
